1

2 Glycolytic flux in *Saccharomyces cerevisiae* is dependent on RNA polymerase III and its negative regulator Maf1

3

4

5

6

7 Róża Szatkowska<sup>1</sup>, Manuel Garcia-Albornoz<sup>2</sup>, Katarzyna Roszkowska<sup>1</sup>, Stephen Holman<sup>3</sup>, Simon Hubbard<sup>2</sup>,

8 Robert Beynon<sup>3</sup>, Małgorzata Adamczyk \*<sup>1</sup>

9

10

11

12 <sup>1</sup>Chair of Drug and Cosmetics Biotechnology, Faculty of Chemistry, Warsaw University of Technology, Poland

13

14 <sup>2</sup>Division of Evolution & Genomic Sciences, School of Biological Sciences, Faculty of Biology, Medicine and

15 Health, Manchester Academic Health Science Centre, University of Manchester, UK

16

17 <sup>3</sup>Centre for Proteome Research, Institute of Integrative Biology, University of Liverpool, Liverpool, UK

18

19

20

21

22 Corresponding author: [madamczyk@ch.pw.edu.pl](mailto:madamczyk@ch.pw.edu.pl)

23

24

25

26

27

28 **Abstract**

29 Protein biosynthesis is energetically costly, is tightly regulated and is coupled to stress conditions including  
30 glucose deprivation. RNA polymerase III (RNAP III) driven transcription of tDNA genes for production of tRNAs is  
31 a key element in efficient protein biosynthesis. Here we present an analysis of the effects of altered RNAP III  
32 activity on the *Saccharomyces cerevisiae* proteome and metabolism under glucose rich conditions. We show for  
33 the first time that RNAP III is tightly coupled to the glycolytic system at the molecular systems level. Decreased  
34 RNAP III activity or the absence of the RNAP III negative regulator, Maf1 elicit broad changes in the abundance  
35 profiles of enzymes engaged in fundamental metabolism in *S. cerevisiae*. In a mutant compromised in RNAP III  
36 activity there is a repartitioning towards amino acids synthesis *de novo* at the expense of glycolytic throughput.  
37 Conversely, cells lacking Maf1 protein have greater potential for glycolytic flux.

38

39

## 40 Introduction

41 Regulation of glycolytic flux is a long standing, but still highly relevant, issue in biology and pathobiology.  
42 Glycolytic performance is connected to enzymes abundance, cell fermentative activity and proliferation, all  
43 hallmarks of the “Warburg effect”. Both *Saccharomyces cerevisiae* and mammalian cells can sense glycolytic  
44 state/flux intracellularly, a dominant signal over that of external nutritional status [1–4]. In *Saccharomyces*  
45 *cerevisiae* under favorable growth conditions, high glycolytic activity elicits rapid cell growth, due to robust  
46 synthesis of proteins and biomass expansion [5–7]. Nutrient limited growth, on the other hand, is associated  
47 with a down regulation of transcription and protein synthesis to reduce demands on the ribosomal machinery  
48 and an appropriate supply of amino acids and tRNAs.

49  
50 As key players in protein synthesis, transfer RNAs are synthesized by RNA Polymerase III (RNAP III), which is  
51 also responsible for the transcription of other specific products such as ribosomal 5S rRNA and spliceosomal U6  
52 snRNA. RNAP III activity is regulated by extracellular glucose levels [8,9]. The only known direct regulatory  
53 factor of RNAP III in *S. cerevisiae* is the protein Maf1, a mediator of a range of stress signals [10–13] conserved  
54 from yeast to human [14]. Yeast Maf1 inhibits RNAP III activity reversibly under carbon source starvation and  
55 oxidative stress, reducing tRNA transcript levels [15]. Although the *MAF1* gene is not essential for yeast  
56 viability, *maf1Δ* cells are unable to repress RNAP III [15–18].

57  
58 Under favorable growth conditions, Maf1 is an interaction partner of several cytoplasmic proteins playing  
59 different biological functions (Fig 1 A and B), but its function in the cytoplasm is unknown. Maf1 is a target of  
60 several kinases and phosphorylation patterns may dictate cellular localization [15,19–25] (Fig 1 B). Although  
61 *MAF1* deletion is not lethal under optimal growth conditions, deletion mutants display high tRNA transcription  
62 with diminished growth on non-fermenting carbon sources at 30°C; it becomes lethal, however, at elevated  
63 temperatures. The low growth rate results from a decrease in steady state mRNA levels of *FBP1* and *PCK1*  
64 genes encoding the key gluconeogenesis enzymes fructose 1,6 bisphosphatase (Fbp1) and  
65 phosphoenolpyruvate carboxykinase (Pck1) [10,26]. Intriguingly, this *maf1Δ* growth defect on non-fermentable  
66 carbon sources is suppressed by point mutation (*rpc128-1007*) in the second largest RNAP III subunit  
67 *RET1/C128* [13]. tRNA transcription levels in this *rpc128-1007* mutant are very low, which suggests that the

68 temperature-sensitive lethality of *maf1Δ* can be rescued by attendant reduction of RNAP III activity, or a critical  
69 process affected by this transcription. The *maf1Δ* and *rpc128-1007* strains have different phenotypes, not only  
70 in growth on non-fermentable carbon sources, but also in preference towards glucose utilization, in excess  
71 glucose [13,27]. Transcription of the high affinity glucose transporter genes *HXT6*, *HXT7* is decreased in *maf1Δ*,  
72 but increased over WT in the *maf1Δ* second-site suppressor *rpc128-1007* [27], suggesting differences in glucose  
73 utilization.

74

75 We wished to explore the potential for a feedback loop between control of glycolytic flux and RNAP III in yeast  
76 cells by label free proteomics, which revealed changes in abundance of a large group of proteins in *maf1Δ* and  
77 *rpc128-1007* strains, supported with targeted analysis of specific metabolites. We provide novel molecular data  
78 which is able to explain the severe reduction in growth rate caused by RNAP III mutation *rpc128-1007* through  
79 cellular processes that facilitate efficient glucose metabolism in the *MAF1* deletion strain on glucose. Changes  
80 in protein profiles impact several metabolic pathways, suggesting differences in cellular metabolic  
81 homeostasis in the mutant strains and providing an alternative explanation for *maf1Δ* lethality on non-  
82 fermentable carbon sources. Finally, using yeast as a model organism, which is often used for studies of the  
83 “Warburg effect”, we established direct metabolic relationship between the capacity of the glycolytic pathway  
84 and transcription of non-coding genes, which can explain why several cancerous cell lines exhibit higher RNAP  
85 III activity, creating a new perspective on glucose flux modification *via* manipulation of the RNAP III holoenzyme  
86 as an novel therapeutic strategy.

87

88

## 89 **Materials and Methods**

### 90 **Yeast strains and media.**

91 The following strains were used: wild-type MB159-4D [28] with unchanged RNAP III activity, the MA159-4D  
92 *maf1::URA3* [27] *MAF1*-deficient mutant with elevated RNAP III activity and MJ15-9C mutant [13] with a single  
93 point mutation in the *RET1/C128* RNAP III subunit with reduced polymerase activity. Yeast strains were  
94 cultured in rich medium (YP; 1% yeast extract, 1% peptone) supplemented with either 2% glucose (YPD) or 2%  
95 glycerol (YPGly) as a carbon source. Overnight cell cultures were grown in YPD medium. Cells were harvested  
96 by centrifugation (2000 rpm, RT) and washed twice with fresh, sterile YPD or YPGly medium. Yeast cells were  
97 diluted to  $A_{600} \approx 0.1$  and grown in YPD or YPGly until exponential phase ( $A_{600} \approx 1.0$ ). All yeast cultures were  
98 incubated in 30°C with agitation 250 rpm. *GCN4-3HA* DNA construct for chromosomal C-terminus fusion was  
99 prepared as described previously [27,29]. Hexokinase isoforms (*HXK1*, *HXK2*, *GLK1*) single and double gene  
100 deletions were created by transforming haploid yeast strains with appropriate PCR fragments. For *HXK1*  
101 deletion amplification of *His3MX6* cassette on *pFA6-VC155-His3MX6* plasmid DNA was done. DNA constructs  
102 for obtaining *HXK2* and *GLK1* deficient strains were amplified on gDNA of BY4741 *glk1Δ* and BY4741 *hvk2Δ*  
103 (Euroscarf). High-efficiency yeast transformation using LiAc/SS carrier DNA/PEG method was used according to  
104 Gietz [30]. All yeast strains are listed in Table 1.

105

106 **Table 1. Yeast strains used in the study.**

| Strain                | Genotype                                                             | Reference/ Source |
|-----------------------|----------------------------------------------------------------------|-------------------|
| MB159-4D              | MATa SUP11 ura3 leu2-3, 112 ade2-1 lys2-1 trp                        | [10]              |
| MA159-4D <i>maf1Δ</i> | MATa SUP11 ura3 leu2-3, 112 ade2-1 lys2-1 trp<br><i>maf1::URA3</i>   | [27]              |
| MB159-4D <i>maf1Δ</i> | MATa SUP11 ura3 leu2-3, 112 ade2-1 lys2-1 trp<br><i>maf1::kanMX6</i> | [28]              |
| MJ15-9C               | MATa <i>rpc128-1007</i> SUP11 ura3 leu2-3, 112 ade2-1 lys2-1<br>trp  | [13]              |

|                                   |                                                                                                    |            |
|-----------------------------------|----------------------------------------------------------------------------------------------------|------------|
| RS159-4D Gcn4-3HA                 | MATa SUP11 ura3 leu2-3, 112 ade2-1 lys2-1 trp <i>Gcn4-3HA-kanMX6</i>                               | This study |
| RS15-9C Gcn4-3HA                  | MATa <i>rpc128-1007</i> SUP11 ura3 leu2-3, 112 ade2-1 lys2-1 trp <i>Gcn4-3HA-kanMX6</i>            | This study |
| RS159-4D Gcn4-3HA <i>maf1Δ</i>    | MATa SUP11 ura3 leu2-3, 112 ade2-1 lys2-1 trp <i>maf1::URA3 Gcn4-3HA-kanMX6</i>                    | This study |
| KR159-4D <i>hxx1Δ</i>             | MATa SUP11 ura3 leu2-3, 112 ade2-1 lys2-1 trp <i>hxx1::HIS3MX6</i>                                 | This study |
| KR159-4D <i>maf1Δ hxx1Δ</i>       | MATa SUP11 ura3 leu2-3, 112 ade2-1 lys2-1 trp <i>maf1::URA3 hxx1::HIS3MX6</i>                      | This study |
| KR15-9C <i>hxx1Δ</i>              | MATa <i>rpc128-1007</i> SUP11 ura3 leu2-3, 112 ade2-1 lys2-1 trp <i>hxx1::HIS3MX6</i>              | This study |
| KR159-4D <i>hxx1Δ hxx2Δ</i>       | MATa SUP11 ura3 leu2-3, 112 ade2-1 lys2-1 trp <i>hxx1::HIS3MX6 hxx2::kanMX4</i>                    | This study |
| KR159-4D <i>maf1Δ hxx1Δ hxx2Δ</i> | MATa SUP11 ura3 leu2-3, 112 ade2-1 lys2-1 trp <i>maf1::URA3 hxx1::HIS3MX6 hxx2::kanMX4</i>         | This study |
| KR15-9C <i>hxx1Δ hxx2Δ</i>        | MATa <i>rpc128-1007</i> SUP11 ura3 leu2-3, 112 ade2-1 lys2-1 trp <i>hxx1::HIS3MX6 hxx2::kanMX4</i> | This study |
| KR159-4D <i>hxx2Δ</i>             | MATa SUP11 ura3 leu2-3, 112 ade2-1 lys2-1 trp <i>hxx2::kanMX4</i>                                  | This study |
| KR159-4D <i>maf1Δ hxx2Δ</i>       | MATa SUP11 ura3 leu2-3, 112 ade2-1 lys2-1 trp <i>maf1::URA3 hxx2::kanMX4</i>                       | This study |
| KR15-9C <i>hxx2Δ</i>              | MATa <i>rpc128-1007</i> SUP11 ura3 leu2-3, 112 ade2-1 lys2-1 trp <i>hxx2::kanMX4</i>               | This study |
| KR159-4D <i>hxx1Δ</i>             | MATa SUP11 ura3 leu2-3, 112 ade2-1 lys2-1 trp                                                      | This study |

|                                             |                                                                                                       |            |
|---------------------------------------------|-------------------------------------------------------------------------------------------------------|------------|
| <i>glk1Δ</i>                                | <i>hxx1::HIS3MX6 glk1::kanMX4</i>                                                                     |            |
| KR159-4D <i>maf1Δ</i><br><i>hxx1Δ glk1Δ</i> | MATa SUP11 ura3 leu2-3, 112 ade2-1 lys2-1 trp<br><i>maf1::URA3 hxx1::HIS3MX6 glk1::kanMX4</i>         | This study |
| KR15-9C <i>hxx1Δ</i><br><i>glk1Δ</i>        | MATa <i>rpc128-1007</i> SUP11 ura3 leu2-3, 112 ade2-1 lys2-1<br>trp <i>hxx1::HIS3MX6 glk1::kanMX4</i> | This study |
| RS159-4D <i>glk1Δ</i>                       | MATa SUP11 ura3 leu2-3, 112 ade2-1 lys2-1 trp<br><i>glk1::kanMX4</i>                                  | This study |
| RS159-4D <i>maf1Δ</i><br><i>glk1Δ</i>       | MATa SUP11 ura3 leu2-3, 112 ade2-1 lys2-1 trp<br><i>maf1::URA3 glk1::kanMX4</i>                       | This study |
| RS15-9C <i>glk1Δ</i>                        | MATa <i>rpc128-1007</i> SUP11 ura3 leu2-3, 112 ade2-1 lys2-1<br>trp <i>glk1::kanMX4</i>               | This study |
| BY4741 <i>hxx2Δ</i>                         | MATa his3Δ1 leu2Δ0 met15Δ0 ura3Δ0 <i>hxx2::kanMX4</i>                                                 | Euroscarf  |
| BY4741 <i>glk1Δ</i>                         | MATa his3Δ1 leu2Δ0 met15Δ0 ura3Δ0 <i>glk1::kanMX4</i>                                                 | Euroscarf  |
| BY4741 <i>reg1Δ</i>                         | MATa his3Δ1 leu2Δ0 met15Δ0 ura3Δ0 <i>reg1::kanMX4</i>                                                 | Euroscarf  |
| MB159-4D<br>[pBM2636]                       | MATa SUP11 ura3 leu2-3, 112 ade2-1 lys2-1 trp<br>[ <i>HXT1::lacZ</i> ]                                | This study |
| MB159-4D <i>maf1Δ</i><br>[pBM2636]          | MATa SUP11 ura3 leu2-3, 112 ade2-1 lys2-1 trp<br><i>maf1::KanMX6</i> , [ <i>HXT1::lacZ</i> ]          | This study |
| MB15-9C<br>[pBM2636]                        | MATa <i>rpc128-1007</i> SUP11 ura3 leu2-3, 112 ade2-1 lys2-1<br>trp, [ <i>HXT1::lacZ</i> ]            | This study |

107

## 108 Proteomic analysis.

109 Samples (approx. 15 ml culture medium) - corresponding to  $25 \times 10^6$  cells as determined in a cell count on  
 110 hemocytometer were analysed by global label-free proteomics. Cells were spun down (10 min, 4°C) and the  
 111 pellets flash frozen in liquid N<sub>2</sub> for storage. Cells were resuspended in 50 mM NH<sub>4</sub>HCO<sub>3</sub>, protease inhibitor

112 ROCHE mini complete protease inhibitor. The samples were homogenized with MiniBeadbeater 24 (Biospec  
113 products) using the 200  $\mu$ l of glass beads (425-600  $\mu$ m; Sigma Aldrich) 15 times (3000 hits per min) with a  
114 duration of 30 s each with a 1 min cool down period in between each cycles. The cells were further centrifuged  
115 (10 min, 13000 rpm, 4°C). 250  $\mu$ l fresh breaking-buffer was added to pellets and cells were washed by vigorous  
116 vortexing. The wash and cell debris were collected as flow through. Each flow through and supernatants from  
117 previous steps were combined. Protein concentration was determined with a Bradford assay [31].

118

119 A volume equivalent to  $25 \times 10^6$  cells of each homogenate was removed, diluted with 25 mM AMBIC containing  
120 0.05% Rapigest (Waters, Manchester) and shaken (550 rpm, 10 min, 80°C). The samples were then reduced  
121 (addition of 10  $\mu$ l of 60 mM DTT and incubation at 60°C for 10 min) and alkylated (addition of 10  $\mu$ l of 180 mM  
122 iodoacetamide and incubation at room temperature for 30 min in the dark). Trypsin (Sigma, Poole, UK,  
123 proteomics grade) was reconstituted in 50 mM acetic acid to a concentration of 0.2  $\mu$ g/ $\mu$ l and 10  $\mu$ l was added  
124 to the sample followed by overnight incubation at 37°C. The digestion was terminated and RapiGest™ removed  
125 by acidification (1  $\mu$ l of TFA and incubation at 37°C for 45 min) and centrifugation (15,000 x g, 15 min). To check  
126 for complete digestion each sample was analyzed pre- and post-acidification by SDS-PAGE.

127

128 For LC-MS/MS analysis, a 2  $\mu$ l injection of each digest, corresponding to approximately  $25 \times 10^4$  cells, was  
129 analyzed using an Ultimate 3000 RSLC™ nano system (Thermo Scientific, Hemel Hempstead) coupled to a  
130 QExactive™ mass spectrometer (Thermo Scientific). The sample was loaded onto the trapping column (Thermo  
131 Scientific, PepMap100, C18, 300  $\mu$ m X 5 mm), using partial loop injection, for 7 min at a flow rate of 4  $\mu$ l/min  
132 with 0.1% (v/v) FA. The sample was resolved on the analytical column (Easy-Spray C18 75  $\mu$ m x 500 mm 2  $\mu$ m  
133 column) using a gradient of 97% A (99.9% water: 0.1% formic acid) 3% B (99.9% ACN: 0.1% formic acid) to 60%  
134 A: 40% B over 90 min at a flow rate of 300 nL min<sup>-1</sup>. The data-dependent program used for data acquisition  
135 consisted of a 70,000 resolution full-scan MS scan (AGC set to  $1e^6$  ions with a maximum fill time of 250 ms) the  
136 10 most abundant peaks were selected for MS/MS using a 17,000 resolution scan (AGC set to  $5e^4$  ions with a  
137 maximum fill time of 250 ms) with an ion selection window of 3 m/z and a normalised collision energy of 30. To  
138 avoid repeated selection of peptides for MS/MS the program used a 30 s dynamic exclusion window.

139

140 **Label-free quantification.**



141 The raw data from the mass spectrometer was then processed using MaxQuant (MQ) software version 1.5.3.30  
142 [32]. Protein identification was performed with the built-in Andromeda search engine, searching MS/MS  
143 spectra vs. the *S. cerevisiae* strain ATCC 204508/S288c downloaded from UniProt.  
144 (<https://www.uniprot.org/proteomes/UP000002311>). The following parameters were used; digest reagent:  
145 trypsin, maximum missed cleavages: 2, modifications: protein N-terminal acetylation and methionine oxidation,  
146 with a maximum of five modifications per peptide. The false discovery rate (FDR) for accepted peptide  
147 spectrum matches and protein matches was set to 1%. For protein quantification, the 'match between runs'  
148 options was selected. Label free quantification was performed with the MaxLFQ algorithm within MaxQuant  
149 (MQ), based on razor and unique peptides. All other MQ parameters were left at default values.

150

### 151 **Protein significance testing.**

152 To determine statistically significantly changing proteins with respect to the wild-type strain we used the  
153 MSstats package [33] in the R environment. Protein identities, conditions, biological replicates and intensities  
154 were directly uploaded from the MaxQuant output. Protein ID information was obtained from the  
155 'proteinGroups.txt' file, conditions and biological replicates from the 'annotation.csv' file, and intensities from  
156 the 'evidence.txt' file. Data normalization was performed using the 'equalizeMedians' option and  
157 summarization using the Tukey's median polish option. Following this, a condition comparison was performed  
158 using the 'groupComparison' option from where the  $\log_2$  fold changes and adjusted  $p$ -values were obtained.

159

### 160 **Functional analysis.**

161 Gene ontology enrichment analysis was performed with the online application Panther (34), directly on the  
162 Gene Ontology Consortium webpage (<http://pantherdb.org/>). The background set consisted of all proteins  
163 identified in a given MS experiment. Protein changes were mapped to central carbon and amino acid metabolic  
164 pathways following KEGG database [35] guidelines. Maf1 protein-protein interactions (PPI's) were obtained  
165 from the STRING [36] database and clustered with the Cytoscape [37] tool.

166

### 167 **Transcription Factor target enrichment analysis**

168 For transcription factor (TF) target enrichment analysis, all proteins with an adjusted  $p$  value below 0.05 from  
169 both comparisons (WT - *rpc128-1007* and WT - *maf1 $\Delta$* ) were uploaded to the GeneCodis tool [38]. Proteins  
170 were classified according to their positive or negative fold change and the background set consisted of all  
171 proteins identified in the given MS experiment. All statistical parameters were left as default. Adjusted  $p$ -values  
172 were obtained indicating those statistically significantly TFs being active according to their known target  
173 proteins.

174

### 175 **Western blotting.**

176 The total cellular proteins from Gcn4-3HA expressing yeast cells were extracted as described previously [27].  
177 Protein extracts were separated by 12% SDS-PAGE and transferred to nitrocellulose membrane by  
178 electrotransfer (1 h, 400 mM, 4°C). For detection of HA-tagged proteins, monoclonal mouse anti-HA (1:3330,  
179 Sigma, H3663) and polyclonal goat anti-mouse antibodies (1:2000, Dako P0447) conjugated with horseradish  
180 peroxidase (HRP) were used. For Vma2 protein detection, monoclonal mouse anti-Vma2 antibodies (1:4000,  
181 Life Technologies, A6427) were used.

182

### 183 **RNA isolation and RealTime PCR quantification.**

184 RNA isolation and real-time PCR amplification was performed as described previously [27]. Isolated RNAs were  
185 examined by SYBR GREEN-based Real-time PCR. Oligonucleotide sequences of the primers used in Real-time  
186 PCR experiment for *GCN4* were taken from Cankorur-Cetinkaya *et al.* [39]. Samples were normalized to two  
187 reference genes - *U2* spliceosomal RNA (*U2*) and small cytosolic RNA (*SCR1*). Expression levels in WT strain  
188 (MB159-4D) was taken as 1.0. The relative expression (mean $\pm$ SD) were calculated for at least three  
189 independent biological replicates. Statistical significance of  $p$ -values were determined by t-student test.

190

### 191 **Enzymatic assays.**

192 All yeast strains including transformants carrying *pBM2636* plasmid [40] for measurement of  $\beta$ -galactosidase  
193 activity were cultivated in rich medium supplemented with 2% glucose (YPD) or 2% glycerol (YPGly) at 30°C  
194 with agitation of 250 rpm until reached  $A_{600} \approx 1.0$ . Yeast cultures were harvested at 5000 rpm at 4°C and  
195 washed twice with 10 mM potassium phosphate buffer, pH = 7.5. Cells for Hxk, Pgk1, Cdc19 and Zwf1 activity

196 assays were suspended in 100 mM KPI pH = 7.5, for  $\beta$ -galactosidase in 50 mM potassium phosphate buffer pH =  
197 7.0, rapidly frozen in liquid nitrogen and stored at  $-20^{\circ}\text{C}$ . Samples were washed twice with sonication buffer  
198 (100 mM potassium phosphate buffer, pH = 7.5, 2 mM  $\text{MgCl}_2$ ) or 50 mM potassium phosphate buffer pH = 7.0  
199 in the second case and disintegrated with Mini-Beadbeater 24 (Biospec products) using glass beads (425–  
200 600  $\mu\text{m}$ ; Sigma Aldrich). Hexokinase (EC 2.7.1.1) activity was measured according to Adamczyk [41],  
201 phosphoglycerate kinase (Pgk1, EC 2.7.2.3) according to De Winde *et al* [42], pyruvate kinase (Cdc19; EC  
202 2.7.1.40) according to Gruning *et al* [43], glucose-6-phosphate dehydrogenase (Zwf1, EC 1.1.1.49) according to  
203 Postma *et al.* [44],  $\beta$ -galactosidase according to Smale 2010 (45), and catalase (EC 1.11.1.6) according to Beers  
204 and Sizer [46]. All assays were performed for at least three independent biological replicates.

205

### 206 **Glycogen, trehalose and fructose 1,6 bisphosphate measurement.**

207 The glycogen and trehalose content was measured in yeast cells, grown in YPD until  $A_{600} \approx 1.0$ . Cell preparation  
208 and extraction was as described in Rossouw *et al.* 2013 [47]. Glycogen determination was as described by  
209 Parrou and Francois [48]. Glucose concentration from glycogen enzymatic breakdown was determined by the  
210 glucose (HK) Assay Kit according to the manufacturer's protocol (Sigma Aldrich, GAHK-20). Trehalose content  
211 was measured using Trehalose Assay Kit (Megazyme International Ireland, Wicklow, Ireland) according to  
212 manufacturer's protocol. Fructose 1,6 bisphosphate was measured according to Peeters *et al.* (2017) [4] with  
213 minor modifications.

214

### 215 **Determination of yeast fermentative capacity.**

216 Fermentative capacity assays were performed as described by van Hoek *et al.* [49] with minor changes. The  
217 fermentative capacity can be defined as the specific maximal production rate of ethanol per gram of biomass  
218 (mmol/g/h) under anaerobic conditions at excess of glucose. Samples corresponding to 60-70 mg dry weight  
219 were harvested by centrifugation at 5000 rpm at  $4^{\circ}\text{C}$ . Cells were washed twice with synthetic medium CBS-  
220 without carbon source and resuspended in CBS (-C) to make 2% wet weight suspensions. Analysis was  
221 performed in a thermostatted ( $30^{\circ}\text{C}$ ) vessel. Cells were flushed with  $\text{N}_2$  gas at a flow rate of approximately  
222 0.6 L/h and glucose was added to a final concentration of 10 g/liter. Samples for measurement of ethanol were  
223 collected every 5 min incubated with 35% (w/v) perchloric acid on ice for 10 min and neutralized with KOH

224 before centrifugation at 13000 rpm and stored in -20°C freezer. The ethanol production of each strain was  
225 normalized to the dry weight of the culture. Ethanol and glycerol in supernatants were determined with  
226 enzymatic assays according to manufacturer (Megazyme).

227

#### 228 **Biomass determination.**

229 Sample suspensions of 1 ml volume in duplicates were filtered over pre-weighted nitrocellulose filters (pore  
230 size, 0.45 µm; HAWPO4700). After removal of medium, the filters were washed with demineralized water, dried  
231 in an oven overnight and weighted [49].

232

## 233 Results

### 234 Overall proteome profiling and changes

235 We hypothesized that perturbations in RNAP III activity would impact on global expression of the proteome.  
236 The lack of the negative regulator of RNAP III, Maf1, as well as the loss of function due to a point mutation in  
237 the RNAP III *RET1/C128* subunit, would be expected to elicit broad changes in the *Saccharomyces cerevisiae*  
238 proteome. We aimed to identify proteins, the changed abundance of which, could explain the diminished  
239 growth of *rpc128-1007* on glucose and de-repression of *HXT2* and *HXT6/7* genes that encode high affinity  
240 glucose transporters, when compared to *maf1Δ* under glucose rich conditions [27]. To examine the  
241 phenomenon we performed a systematic comparative analysis of *maf1Δ* and *rpc128-1007* mutants using label-  
242 free proteomics.

243

244 Reproducible, deep proteome coverage was obtained (Fig 2 A) for *maf1Δ* and *rpc128-1007* mutants grown  
245 under glucose rich conditions. The proteomics data were of high quality, with replicates clustered together and  
246 no systematic difference reflecting sample preparation bias (Fig 2). In total, over 2,300 protein groups were  
247 identified and quantified. As anticipated, there was considerable overlap between the *maf1Δ* and *rpc128-1007*  
248 proteomes (Fig 3). Differential proteome analysis was carried out pairwise in two sets as follows: WT vs *rpc128-*  
249 *1007* mutant and WT vs *maf1Δ* mutant, resulting in 2,294 quantified proteins common to all strains. A subset  
250 of statistically significant changes revealed 249 proteins that were common to both comparisons (with an  
251 adjusted *p*-value < 0.05). This subset of 249 proteins were clustered into coherent groups (see Material and  
252 Methods) which display common Gene Ontology (GO) annotation, consistent with coordinated regulation of  
253 relevant biological processes (Fig 3 B). Some of the groups exhibited parallel changes in the two strains (Groups  
254 1-4) whereas others highlighted divergent, essentially reciprocal, functions in the two strain (i.e. Groups 5–6).  
255 These unbiased clusters show enrichments for concerted biological functions, embodied by the limited subset  
256 of GO term enrichments listed in Fig 3B, including elements of amino acid and monosaccharide/carbohydrate  
257 metabolism. In both strains, enzymes of gluconeogenesis and the glyoxylate cycle were *decreased* when  
258 compared to the reference strain grown under the same glucose repression conditions (Group 2). Groups 7 and  
259 9 also show decreased protein abundance with respect to wild type, and are similarly enriched in enzymes  
260 from the TCA cycle, purine ribonucleotide biosynthetic pathways, *de novo* inosine monophosphate

261 biosynthesis, and also mitochondrial transmembrane transport. In contrast, many of the enzymes involved in  
262 *de novo* amino acid synthesis were increased in abundance in both *maf1Δ* and *rpc128-1007* (Groups 1, 3, 4).  
263 The negatively correlated, reciprocally altered groups (Groups 5, 6 and 8) were consistent with shifts in  
264 trehalose biosynthesis, pentose phosphate pathway (PPP) activity, oxidative stress, oxidation-reduction  
265 processes, glycine catabolic processes, replicative cell aging and alcohol production.

266

267 **Key enzymes of the glyoxylate cycle are reduced in abundance in both *maf1Δ* and *rpc128-***  
268 ***1007* mutants.**

269 In both strains phosphoenolpyruvate carboxykinase (Pck1) and malate synthase 1 (Mls1) were reduced (Fig 4).  
270 These enzymes direct acetyl-CoA to malate and oxaloacetate that in turn can be metabolized to  
271 phosphoenolpyruvate for gluconeogenesis. The enzymes are components of the glyoxylate cycle that allows  
272 yeast cells to metabolize non-fermentable carbon sources, including fatty acids. The mechanism governing  
273 glucose repressed genes is particularly important in the RNAP III compromised mutant as well as in Maf1  
274 deprived cells due to the previously reported growth perturbations of *maf1Δ* on non-fermentable carbon  
275 source. 2-fold decrease in *maf1Δ PCK1* mRNA was reported [26], though under inducing conditions on glycerol.  
276 Notably, the relative decrease in Pck1 abundance in Maf1 deficient cells is the largest in our proteomic dataset.  
277 The very much decreased Pck1 abundance proves that the enzyme is subject to degradation in a glucose-  
278 dependent manner [50] and the mechanism is not perturbed in both the mutants. Other enzymes of the  
279 glyoxylate cycle, are concomitantly reduced in *maf1Δ* cells, including malate dehydrogenases Mdh2, Mdh3,  
280 isocitrate lyase (Icl1) and glyoxylate aminotransferase (Agx1), the last implicated in glycine synthesis from  
281 glyoxylate. In *rpc128-1007*, most of the glyoxylate enzymes as well as those of the TCA cycle were also  
282 decreased. Enzymes of the TCA and glyoxylate cycles undergo coordinated transcriptional down regulation  
283 [50,51] induced by glucose through the master kinase Snf1/AMPK [52,53] therefore strongly suggesting  
284 unperturbed functioning of Snf1 signaling on glucose. In contrast, the other key enzyme of gluconeogenesis,  
285 Fbp1 (fructose 1,6 biphosphatase) that bypasses the physiologically irreversible step in the glycolytic pathway,  
286 was increased under glucose deprivation in *maf1Δ*, but was unchanged in *rpc128-1007* mutant.

287

288 **Reduction in glycolytic enzymes in a RNAP III compromised strain correlates with lower**  
289 **activity of the glucose transporter Hxt1.**

290 Proteome analysis captured changes in relative cellular abundances of all glycolytic enzymes and implied a  
291 reduced capacity for glycolysis in *rpc128-1007* cells, but an unchanged glycolytic capacity in *maf1Δ* cells (Fig 4).  
292 In *rpc128-1007*, enzymes that were significantly decreased (between 2- and 2.6-fold) included glyceraldehyde-3-  
293 phosphate dehydrogenase isozyme 1 (Tdh1), enolase (Eno1), glyceraldehyde-3-phosphate dehydrogenase  
294 isozyme 2 (Tdh2), 3-phosphoglycerate kinase (Pgk1) and glucokinase (Glk1). The lower abundance of the entire  
295 complement of glycolytic enzymes is consistent with reduced glycolytic performance in *rpc128-1007*.

296

297 Glycolytic flux in *S. cerevisiae* can regulate glucose uptake, at least in part through the activity of glucose uptake  
298 mechanisms [54] and in particular, induction and increases of membrane internalization of low-affinity glucose  
299 transporters [40,55–58]. The principal example is Hxt1, only activated when yeast grow in glucose rich media  
300 [40]. We explored the potential for changes in glucose transport by measurement of transcriptional de-  
301 repression of the key gene encoding the major low affinity, high capacity glucose transporter *HXT1*, in *maf1Δ*  
302 and *rpc128-1007* using a *HXT1-lacZ* reporter plasmid (Fig 5 B). The *HXT1* gene was strongly activated in *maf1Δ*  
303 under glucose rich conditions, whereas a 3-fold lower activity of the *HXT1* promoter was observed in  
304 *rpc128-1007* cells in the same conditions. When assessed in cells grown on glycerol, expression of *HXT1-lacZ*  
305 reporter was decreased in all strains (Fig 5 B) as expected [40]. Consistent with the reports on mutants in genes  
306 of the glycolytic pathway, which are blocked in glycolysis [59], the *HXT1* expression was reduced in RNAP III  
307 compromised yeast suggesting that in this mutant, supply of glucose for a functional glycolytic pathway cannot  
308 be maintained.

309

310 **Positive relationship between Hxk2, Tdh and Cdc19 enzyme activities and the potency of**  
311 **RNAP III dependent transcription.**

312 Since *HXT1* gene expression was elevated in *maf1Δ*, but decreased in *rpc128-1007*, we measured the activity of  
313 selected glycolytic enzymes *in vitro* [41] in both mutant strains and evaluated the relationship between activity  
314 changes and changes in protein abundance assessed by proteomics. *S. cerevisiae* encodes three isoenzymes  
315 with hexokinase activity (Fig 5 A). Proteomic analysis suggested that Glk1 was the isoenzyme phosphorylating

316 glucose in *maf1Δ* (Fig 4), with increased abundance whereas Hxk1 and Hxk2 were observed decreased in this  
317 strain. For *rpc128-1007*, the protein abundance of all enzymes conferring hexokinase activity was decreased  
318 (Fig 4). We therefore grew the three strains in rich media supplemented with 2% (w/v) glucose and measured  
319 the hexokinase reaction ( $V_{max}$ ) in cell free extracts. Total hexokinase activity was increased in *maf1Δ* and  
320 reduced in *rpc128-1007* (Fig 5 C, solid bars).

321

322 To quantify the activities of the individual hexokinase enzymes we designed and constructed deletion mutants  
323 of hexokinases in the three strains (Fig 5 C, D). Quantification of glucose phosphorylation activity in single and  
324 double null mutants of genes encoding hexokinases clarifies that hexokinase 2 (Hxk2) is the predominant  
325 isoenzyme engaged in glucose phosphorylation in *maf1Δ*. The triple deletion *maf1Δ hxx1Δ glk1Δ*, in which the  
326 only isoform left intact is Hxk2, results in comparable hexokinase activity to the observed in *maf1Δ* deletion  
327 strain with all the isoforms present (Fig 5 C). In contrast, the mutants in whom we observe the reverse trend in  
328 the enzymatic activity, are the *maf1Δ hxx2Δ* double mutant and *maf1Δ hxx1Δ hxx2Δ* triple mutant. An increase  
329 in glycolytic flux is possible to achieve in cells lacking Maf1 despite a decrease in Hxk2 abundance and only a  
330 slight increase in Glk1 cellular concentration. Under growth on glycerol, there was an increased contribution of  
331 Hxk1 to total hexokinase activity in wild-type, *maf1Δ* and *rpc128-1007* (Fig 5 D), suggesting that the  
332 compensation regulatory mechanisms are not perturbed in the two mutant strains. *HXX1* induction by non-  
333 fermentable carbon source has previously been reported [60]. Interestingly, on glycerol growth, the total  
334 hexokinase activity in *rpc128-1007* was higher than in *maf1Δ*.

335

336 Since glyceraldehyde-3-phosphate dehydrogenase (Tdh) and pyruvate kinase (Cdc19) are important providers of  
337 NADH and ATP respectively, these enzymes were also assayed. Measuring the activity of controlling and rate-  
338 limiting glycolytic enzymes is one of the techniques to estimate carbon flux through the entire pathway. In  
339 yeast, glyceraldehyde-3-phosphate dehydrogenase, placed between upper and lower segments of glycolysis, is  
340 considered a rate controlling step of glycolysis [61,62] whereas Cdc19 kinase levels affect the rate of carbon  
341 flux and its direction towards pyruvate (PYR) or phosphoenolpyruvate (PEP) under fermentative conditions. The  
342 activity of Cdc19 is sufficient to cause a shift from fermentative to oxidative metabolism in *S. cerevisiae* [43,63]  
343 and controls glycolytic rate during growth on glucose [64].

344



345 In *maf1Δ*, in which there was a small increase of Tdh1, 2 abundance (Tdh1; 0.21 log<sub>2</sub>FC and 0.3 adj. *p* value,  
346 Tdh2: 0.16 log<sub>2</sub>FC and 0.37 adj. *p* value), *in vitro* activity was 2-fold higher (Fig 5 E). From proteomics, Tdh  
347 activity was slightly lower in *rpc128-1007* cells under the same growth conditions, but Tdh activity measured in  
348 *rpc128-1007* grown on glycerol was significantly lower when compared to the reference strain, which suggests  
349 that the catalytic activity of the enzyme decreases *in vivo* while the enzyme converts 1,3-bisphosphoglycerate  
350 (1,3-BPG) into glyceraldehydes-3-phosphate (G3P) in the reverse direction to glycolysis, when the enzymes is  
351 involved in gluconeogenesis in the presence of non-fermentable carbon sources in the medium. This shuttle  
352 between the cytosol and the nucleus linking metabolic redox status to gene transcription [65] and contributes  
353 to tRNA transport [66].

354

355 We further measured activity of the final enzyme in the glycolytic pathway, pyruvate kinase (Cdc19) activity.  
356 Cdc19 concentration is comparable in *maf1Δ* and its parental strain. We found (Fig 5 F), that Cdc19 shows  
357 significantly lower enzymatic activity in *rpc128-1007* compared to the reference strain grown on glucose, but a  
358 slightly elevated activity in *Maf1* deficient cells both on glucose and glycerol. Overall, in *maf1Δ* the glycolytic  
359 enzymes show higher activity than originally thought judging by proteomics data, whereas Hxk2, Tdh and  
360 Cdc19 protein decreased abundance in *rpc128-1007* is fully in agreement with their reduced enzymatic activity.  
361 This lead us to the conclusion that glycolytic flux is diminished in *rpc128-1007*, whereas in *maf1Δ* it is not only  
362 higher than in *rpc128-1007* but also in WT. Due to the fact that F16BP mediated allosteric control [67–69], but  
363 not Cdc19 abundance or phosphorylation, was reported as having a predominant role in regulating the  
364 metabolic flux through the pyruvate kinase Cdc19 [70]. Therefore, we measured F16BP intracellular  
365 concentration.

366

### 367 **Fructose 1,6 bisphosphate intracellular concentration does not reflect differences in RNAP** 368 **III activity and glycolytic flux in the mutant strains.**

369 The glycolytic metabolite F16BP is a molecule triggering of the metabolic switch from respiration to  
370 fermentation in unicellular and higher organisms [3,4,64]. We reasoned that lower glycolytic flux in *rpc128-*  
371 *1007*, would result in lower fructose 1,6 bisphosphate (F16BP) concentration in this mutant. We measured  
372 F16BP in *rpc128-1007* grown under anaerobic conditions. After addition of 100 mM glucose, F16BP

373 concentration sharply increased during the first two minutes to the physiological level observed in the wild-  
374 type cells but then declines to a new steady state. In *maf1Δ* cells, the concentration of F16BP is similar to  
375 *rpc128-1007* but there is no initial overshoot (Fig 6). The intracellular level of F16BP is therefore unlikely to be  
376 the trigger for the perturbed metabolic switching in cells with different RNAP III activity. Another product of  
377 glycolysis (or its side branches) may control the transcriptional reprogramming in yeast, particularly when there  
378 are multiple-metabolite-responsive elements present at promoters to sense diverse metabolic signals.  
379 Additionally, F16BP concentration may affect Cdc19 activity *in vivo*, thus the flux direction.

380

### 381 **Higher glucose flux in Maf1 deficient cells results in activation of glycogen and trehalose** 382 **shunts.**

383 We explored the direction of carbon flux in *maf1Δ* in the absence of any increase in F16BP concentration. Yeast  
384 cells are equipped to counteract excessive influx of glucose by diversion of glucose into glycogen and trehalose  
385 [71]. During exponential growth, glycogen and trehalose biosynthesis play additional roles as part of an  
386 adaptive response facilitating survival when the cell is challenged with increased glycolytic flux as a  
387 consequence of glucose overflux into a cell. The glycogen shunt prevents accumulation of glycolytic  
388 intermediates, particularly F16BP and ATP that otherwise would ultimately lead to perturbation in cell  
389 metabolic homeostasis [72–75].

390

391 The proteomics data confirmed a strong, negative correlation between RNAP III activity and enzyme abundance  
392 in the trehalose and glycogen synthesis pathways, which share common enzymes. UDP-glucose  
393 pyrophosphorylase (Ugp1), trehalose-6-P synthases (Tps1 and Tps2) and glycogen synthase (Gsy2) increase in  
394 *maf1Δ*, whilst the same proteins were markedly reduced in *rpc128-1007* cells (Fig 3, group 6, Fig 4). The  
395 product of Tps1 activity, trehalose-6-phosphate, controls glycolysis by restricting the flow of glucose into the  
396 pathway and is an allosteric inhibitor of hexokinase 2 activity [72,76]. We assessed the metabolic allocation of  
397 glucose through quantification of trehalose and glycogen content during exponential growth. Both metabolites  
398 were 2.5-fold higher in *maf1Δ* in the presence of high glucose. By contrast, *rpc128-1007* cells could accumulate  
399 neither glycogen nor trehalose (Fig 7 A and B).

400

401 In summary, the results are consistent with increased glycolytic flux in *maf1Δ* and conversely, a diminished flux  
402 in *rpc128-1007*. Metabolic overflow in *maf1Δ* leads to flux redistribution into the trehalose pathway, to protect  
403 the cells from either an increase in intracellular glucose concentration or accumulation of glycolytic  
404 intermediates downstream from glucose-6-phosphate as observed in wild-type budding yeast [77].

405

#### 406 **Ethanol overproduction is not observed in cells lacking Maf1 during logarithmic growth.**

407 In yeast, glucose is fermented to ethanol for energy production, as it is often used as a measure of increased  
408 glycolytic flux. We examined, whether *maf1Δ* produces ethanol more efficiently than the wild type, as might be  
409 predicted from the Group 8 GO terms (Fig 2). Pyruvate decarboxylases isoenzymes Pdc5 and Pdc6 (the key  
410 enzymes in alcohol fermentation) are increased in abundance in *maf1Δ* (1.7 and 2.3 Log<sub>2</sub>FC respectively),  
411 suggested that Maf1 deficiency should lead to increased ethanol synthesis. We performed a fermentative  
412 capacity assay under anaerobic conditions; without cells pretreatment or with the pretreatment, when cells  
413 were glucose starved for 10 min. Under both condition there was no evidence of enhanced ethanol production  
414 in *maf1Δ* (Fig 7 C, S1 Table). Instead, accumulation of the fermentation by-product, glycerol was observed (Fig  
415 7 D). This is consistent with increased glycolytic flux being rerouted upstream of pyruvate or downstream from  
416 acetaldehyde by the enzymes of the pyruvate dehydrogenase bypass [49].

417

418 Glycerol rather than ethanol production was also evident under aerobic conditions suggesting that access to  
419 oxygen does not affect the glycolytic flux redirection towards glycerol biosynthetic pathway in *maf1Δ*. The  
420 *maf1Δ* mutant is possibly under oxidative stress, since glycerol production has a role in response to the stress.  
421 Evidence for oxidative stress in *maf1Δ* also derives from increased protein abundance for the pentose  
422 phosphate pathway (PPP) enzymes in this mutant, which balances the systemic manifestation of reactive  
423 oxygen species and the ability to detoxify reactive intermediates [78].

424

#### 425 **Activation of pentose phosphate pathway in cells deprived of Maf1 regulator.**

426 The comparative proteomic analysis suggests reciprocal modulation of the pentose phosphate pathway (PPP),  
427 in *rpc128-1007* and *maf1Δ* (Figs 4, 8). PPP is a source of NADPH during oxidative stress conditions. The data are  
428 consistent with an increase in flux through the PPP in *maf1Δ*, which can be achieved by increased glucose-6-

429 phosphate dehydrogenase Zwf1 abundance, the enzyme catalyzing the rate limiting, irreversible step of the  
430 pathway. Downstream enzymes including 6-phosphogluconolactonase (Sol3, Sol4) and 6-phosphogluconate  
431 dehydrogenase Gnd2 that balance the redox potential *via* the cytosolic NADPH/NADP<sup>+</sup> ratio in native yeast cells  
432 and both isoforms of transketolase (Tkl1, Tkl2) are increased in *maf1Δ*. Conversely, depletion of Zwf1, Sol4 Tkl1  
433 and Tkl2 in *rpc128-1007* is consistent with a reduced potential of this mutant to redirect carbon flux from  
434 glucose-6-phosphate (G6P) towards 6-phosphogluconolactone (6PG) and downstream metabolic intermediates  
435 (Figs 4, 8).

436

437 We grew yeast in rich medium supplemented with 2% glucose as previously and measured the Zwf1 glucose-6-  
438 phosphate dehydrogenase reaction rates ( $V_{max}$ ) in cell free extracts to check the potential to produce NADPH.  
439 This enzyme is highly regulated and is critical in determining the overall flow of glucose into the pentose  
440 phosphate pathway [79,80]. Zwf1 activity in *maf1Δ*, was elevated not only on glucose, as carbon source but  
441 also using glycerol whereas the activity in *rpc128-1007* remains essentially unchanged (S1 A Fig). To further  
442 corroborate the relationship between *MAF1* deletion and the oxidative stress response other proteins, such as  
443 Ctt1 stress inducible cytosolic catalase T were elevated (S2 Table). Further, total catalase activity was higher in  
444 *maf1Δ*, when compared to WT or *rpc128-1007* (S1 B Fig). The magnitude of the abundance changes in enzymes  
445 of the oxidative stress response, is observed during carbon source downshift. Here however, it occurs in the  
446 presence of glucose during the exponential phase, indicates that *MAF1* gene deletion elicits broader metabolic  
447 reprogramming than originally thought.

448

#### 449 **RNAP III subunit *RET1/C128* point mutation is associated with metabolic reprogramming** 450 **dependent on transcriptional and translational induction by Gcn4.**

451 Glycolytic intermediates are precursors of the carbon skeletons of several amino acids. Thus, lowered glucose  
452 flux could result in the amino acid starvation response in yeast. We identified a large group of proteins that  
453 were substantially increased in abundance, that are involved in amino acid biosynthesis. The relative  
454 abundance of those was increased in *rpc128-1007* relative to WT. However, the same set of enzymes in *maf1Δ*  
455 were increased in some cases and unchanged in others. The magnitude of the increases were generally much  
456 higher in the *rpc128-1007* compared to the *maf1Δ* mutant. In *rpc128-1007*, over 30 proteins in the pathways

457 for arginine, lysine, leucine, isoleucine, and valine biosynthesis *de novo*, along with aromatic amino acids such  
458 as histidine, tryptophan, tyrosine and threonine or their precursors were elevated (Fig 8).

459

460 In *rpc128-1007*, the decreased cellular concentration was observed in methionine biosynthesis subpathway,  
461 that is for ATP sulfurylase the product of *MET3* gene essential to catalyse the first step for assimilatory  
462 reduction of sulfate to sulfide, involved in methionine metabolism. The other proteins diminished in *rpc128-*  
463 *1007* were Ser3, Ser33, Cys3 and Shm2 contributing to serine and cysteine biosynthesis.

464

465 In *maf1Δ*, the proteins Arg4, Arg3, Cpa2, Bat1, Bat2, Leu1, Leu4, Leu9 and Ilv3 were elevated; all are  
466 components of the metabolic branch that is part of L-arginine and L-leucine biosynthesis (Fig 8). By contrast  
467 *rpc128-1007*, *maf1Δ* cells exhibited enrichment in the branch of serine/cysteine, methionine biosynthesis  
468 pathway and sulfate metabolism (Met3, Met5, Met10, Met14), and these abundance changes were amongst  
469 the largest in the proteomic dataset. The expression of most genes involved in amino acid biosynthesis is under  
470 the control of the Gcn4 transcriptional activator, part of the general amino acids control (GAAC) regulon  
471 [81,82]. *GCN4* transcription is stimulated by starvation for amino acids, purine, glucose limitation and  
472 specifically by initiator tRNA<sup>Met</sup> depletion [83,84]. Therefore, we evaluated the mRNA levels of *GCN4* by RT-PCR  
473 (Fig 9 A).

474

475 The *GCN4* mRNA steady state levels were 11-fold higher in the *rpc128-1007* and, 2-fold elevated in *maf1Δ*. The  
476 difference between these two mutants is reflected in the extent of the response in the proteomics analysis  
477 *rpc128-1007* had much stronger phenotypic change than *maf1Δ*. We constructed mutant strains with  
478 chromosomally encoded *GCN4-3HA* protein fusions to assess Gcn4 protein abundance by immunoblotting.  
479 Gcn4 abundance, normalized to Vma2 level in the total protein extracts, was elevated 3-fold in *rpc128-1007*  
480 and 2-fold in *maf1Δ* when compared to the reference strain (Fig 9 B, C). The marked decoupling between  
481 transcript and protein changes in the strains, *rpc128-1007* (11-fold mRNA, 3-fold protein) and *maf1Δ*, (2-fold  
482 mRNA, 2-fold protein), also suggests that other regulatory factors are in operation.

483

484 For the entire proteome data set, we were able to perform transcription factor enrichment analysis, using the  
485 web-based GeneCodis tool to identify over-representation of the targets of given transcription factors in the

486 differentially abundant proteomes (Fig 10). For *rpc128-1007*, Gcn4 was the predominant transcription factor.  
487 highlighted by the analysis for gene activation. The second most predominant transcriptional factor was Leu3  
488 (S2 Fig) followed by Yap1 and Bas1. We also identified a group of genes with motifs enriched for GATA  
489 transcriptional factors such as Dal81, Dal80 and Gzf3 regulating genes by nitrogen catabolite repression (NCR).  
490  
491 The outcome of experimental and *in silico* analyses is that the dramatic increase in specific protein changes  
492 observed in *rpc128-1007* can be largely attributed to the *GCN4* stress response and *GCN4* de-repression on  
493 glucose. By contrast to the highly focused changes in *rpc128-1007*, the gene regulatory network in *maf1Δ*,  
494 (which liberates RNAP III from regulatory circuits and nutrient signaling) (Fig 1), exhibits a broad spectrum of  
495 modest changes (including more balanced *GCN4* up-regulation) across several cellular processes, to provide the  
496 mutant with better adaptation/selective advantage to growth in glucose-rich environment.

497

## 498 Discussion

499 Regulation of the central carbon metabolism of *S. cerevisiae* has always been a topic of considerable interest.  
500 Here, we present for the first time, the evidence that glycolytic flux in yeast can be modulated accordingly to  
501 the RNAP III activity and that central carbon metabolism adjusts to the activity of RNAP III in yeast. Our results  
502 clearly indicate the new connections between RNAP III and cellular metabolism. On the basis of the previous  
503 and the present findings, we propose that there is an internal signaling in the yeast cells, that competes against  
504 the extracellular nutrients-sensing, when a cell faces non-optimal RNAP III activity.

505

### 506 An RNAP III point mutation in the *RET1/C128* subunit is correlated with lower efficiency of 507 glycolysis and up-regulation of *GCN4* dependent genes of amino acid metabolism.

508 In a previous report we have shown that the *rpc128-1007* strain is insensitive to external glucose concentration  
509 cues, which manifests *via* constitutive overexpression of the *HXT2* gene, whether in glucose or glycerol growth  
510 conditions [27]. Our new data suggest that the *rpc128-1007* mutant operates under substrate limitation, such  
511 as glucose, even though the sugar is present in excess in the growth medium. RNAP III activity inhibition results  
512 in diminished abundance of enzymes in central carbon metabolism and elicits preferential synthesis of proteins  
513 involved in amino acids biosynthesis (Fig 8) attributable to the *GCN4* response. Gcn4 is translationally up-

514 regulated in response to numerous tRNA perturbations [84,85] and yeast cells with the *RET1/C128* point  
515 mutation produce as much as 1.6-fold less tRNA molecules compared to WT. This suppresses the defect of  
516 Maf1 inactivation, caused by increased or unbalanced levels of various tRNAs including increased tRNA<sup>Met</sup> levels  
517 [13]. Initiator tRNA<sup>Met</sup> depletion triggers a *GCN4*-dependent reprogramming of global genome expression in  
518 response to decreased RNAP III transcription in *rpc160-112* mutant (in the largest C160 subunit) [84]. However,  
519 *HXT2* transcription is not dependent on Gcn4 transcriptional activity [84] in the *rpc160-122* mutant. *HXT2*  
520 overexpression in *rpc128-1007* is most likely related to lower glycolytic efficiency in the mutant strain [59], but  
521 the direct regulator of the phenomenon still remains to be discovered.

522

523 In the wild-type yeast cells, most glycolytic enzymes exist with significant overcapacity, regardless the carbon  
524 source. The enzymes are present in the cells at generally fixed concentration, even if reverse glycolytic  
525 processes take place [86]. However, in the *rpc128-1007* mutant, the abundance of all the glycolytic isoenzymes  
526 is reduced and concomitantly with a decrease in abundance of several proteins engaged in the side branches of  
527 the glycolytic pathway (trehalose/glycogen shunt and PP pathway). The two enzymes, fructose 1,6  
528 bisphosphatase Fbp1 and pyruvate kinase 2 Pyk2, that catalyze the reactions in gluconeogenesis are the least  
529 affected in *rpc128-1007* in agreement with the preference of this mutant to grow on respiratory carbon  
530 sources such as glycerol [13].

531

532 In a *Drosophila melanogaster* gut model [87], reduction of RNAP III activity through controlled degradation of  
533 the C160 subunit (C160 encoded by *RPC160*) leads to diminished protein synthesis. Inhibition of RNAP III affects  
534 RNAP I, but not RNAP II-generated transcripts, suggesting that translation is the major factor regulating protein  
535 abundance in RNAP III compromised cells [87]. This further suggests that the *rpc128-1007* mutant might be  
536 limited at translation and indeed, the *rpc128-1007* mutant has reduced tRNA levels [13]. In *rpc128-1007*,  
537 translation seems to be selective towards enzymes in *de novo* amino acids synthesis at the expense of the full  
538 complement of glycolytic enzymes. As a consequence of decreased abundance of the glycolytic enzymes, the  
539 glycolytic flux is very likely to decrease. Proteins could also be selectively stabilized in the *rpc128-1007*  
540 background. This accords with our finding that in *rpc128-1007* there is a decrease in RPN4 regulated elements  
541 of the protein degradation machinery, including the 26S proteasome genes [88,89] (Fig 10, S3 Table). As a  
542 result, an increase resistance to proteostatic challenge in this mutant could ensue (Fig 10). High turnover

543 proteins may be stabilized even in an environment of diminished protein synthesis in *rpc128-1007* [90]. Overall  
544 reduction of protein catabolism might be critical for survival, consistent with a high enrichment of down-  
545 regulated proteins in this genetic background. The reduction of abundance of selected glycolytic enzymes, such  
546 as Hxk2, Tdh and Cdc19 in *rpc129-1007* is followed by the decrease in their enzymatic activity at high  
547 concentrations of glucose (Figs 5 and 6). Lowering the intracellular Cdc19 concentration is sufficient to shift  
548 from fermentative to oxidative metabolism in yeast, which reduced flux towards pyruvate [43]. The lower  
549 abundance and activity of the first (Hxk2) and the last (Cdc19) enzymes in the glycolytic pathway can be  
550 expected to reduce glycolytic flux in the mutant.

551

552 The RNAP III *RET1/C128* mutation elicits a diminution of the low affinity glucose transporter 1 (activated on  
553 high glucose), the major glucose transporter facilitating glucose uptake under glucose rich conditions [56] and  
554 which is under control of Rgt2 (low affinity) glucose sensor (Fig 5B). External glucose signaling, may not be a  
555 dominant factor in reprogram *HXT* genes expression in *rpc128-1007*, glucose metabolism may dominate in this  
556 case [27]. Our data are consistent with the postulate that “glucose” sensing could occur intracellularly [1–4],  
557 but not yet (so far) linked to metabolic reprogramming upon change in RNAP III activity. There is some debate  
558 as to whether the signaling molecule for metabolism switching is fructose 1,6 bisphosphate [4,56]. F16BP  
559 triggers a switch in metabolism from respiration to fermentation in unicellular and higher organisms. It is the  
560 key metabolic factor determining AMPK/Snf1 kinase activity and is a potent activator of Ras pathway [3,4,64]. If  
561 F16BP plays such key roles, we reasoned that the intracellular concentration should be lower *rpc128-1007* and  
562 higher in *maf1Δ*.

563

564 Although significantly lower than in the wild-type cells, the levels of F16BP in the both mutant strains are  
565 comparable (Fig 6). This suggested that in *maf1Δ*, the mechanisms protecting cells from damaging increased  
566 concentrations of glycolytic intermediates are unperturbed thus increasing cells survival; cells capable of  
567 increased glucose consumption.

568

569 Despite the initial rise in F16BP after a glucose pulse, the metabolite attains a steady-state concentration at  
570 levels that are not likely to be toxic to the *rpc128-1007* mutant. In *rpc128-1007* cells, we presume that there is  
571 no direct relationship between intracellular F16BP and the growth defect on glucose medium exhibited by



572 these cells, however alternative scenario is possible, if taking into account the overall abundance of the  
573 glycolytic enzymes and an excess of F16BP which may affect Ras proteins. These cells also exhibit large  
574 decrease in ribosomal proteins (RP) (S4 Table). RNAP III transcription is coordinately regulated with  
575 transcription of rDNA and ribosomal protein coding genes [91,92]. Normally ribosomal proteins and their  
576 mRNAs are stabilized when yeast is subject to increased glucose [93]. Arguably, the lower abundance of RP  
577 proteins in *rpc128-1007* could reduce the energy expense of cells that are unable to metabolize available  
578 extracellular glucose. For the *rpc128-1007*, all of the changes at the proteome level are reminiscent of the  
579 global changes in yeast cells in response to environmentally stressful, glucose deprived conditions. An  
580 exception is the cohort of proteins of the TCA cycle. RNAP III compromised cells have reduced glycolysis but  
581 this reduction does not lead to enhanced oxidative metabolism.

582

583 ***maf1Δ* cells preferentially metabolizes glucose, which results in carbon overflux fueling the**  
584 **side pathways dependent on glycolytic intermediates as precursors.**

585 Lack of Maf1 causes cells to reprogram their metabolism towards higher glycolytic activity when grown under  
586 high glucose conditions. This response is not reflected in an increase in abundance of the glycolytic enzymes  
587 but rather in enzymatic activity. Of course, the profile of activity modulating posttranslational modifications of  
588 these enzymes could well be different in *maf1Δ* but this was beyond the scope of this study. For example,  
589 hexokinase 2 exhibited higher activity in *maf1Δ* even though the protein abundance was reduced and the  
590 activity of this enzyme is regulated by phosphorylation [94,95]. Higher hexokinase activity should lead to  
591 increased flux into glycolysis. However, due to robustness of flux regulation, carbon is redistributed in *maf1Δ*  
592 into the side branches of the glycolytic pathway at glucose-6P (Fig 11). The *maf1Δ* shows increased capability  
593 to direct carbon into all the side branch pathways as suggested by the proteomic data and confirmed by direct  
594 metabolite assay (Fig 7 A). Glucokinase (Glk1), increased in abundance in *maf1Δ*, may redirect glucose toward  
595 glycogen storage as previously postulated [96]. The enzymes of glycogen trehalose and central carbon  
596 metabolism may be altered in *maf1Δ* as these are dependent on control by the major nutrient sensing protein  
597 kinases TOR, PKA, Snf1, Pho85 and the energy sensor Pas kinase [94,97,98].

598

599 In rat hepatoma cells, glucose import, and the activity of hexokinase, hexose phosphate isomerase and the  
600 glucose-6P branches that generate F16BP exert most of the flux control [99]. We believe that in *S. cerevisiae*,  
601 hexokinase 2 and increased activity of the low affinity glucose transporter Hxt1 have the greatest potential to  
602 contribute to flux rerouting in *maf1Δ*. At this stage, we do not know the intracellular signal. The activity of Hxk2  
603 is elevated even though the trehalose shunt, which acts as safety valve against excessive supply of glucose, may  
604 correct glucose influx through allosteric inhibition of Hxk2 by trehalose-6P [72,76]. Further the glycolytic flux  
605 towards pyruvate could be enhanced by Tdh over-activation. However, carbon flux in *maf1Δ* fuel the glycerol  
606 synthesis pathway rather than causing ethanol accumulation. Glycerol accumulation in *maf1Δ* must serve as a  
607 drain for excess reducing power, to ameliorate redox imbalance in the cells. *MAF1* deletion in yeast cells is  
608 associated with redox imbalance as has previously reported by Bonhoure *et al.* [100] in *MAF1* knock-out mice.  
609 In *S. cerevisiae*, this is efficiently counteracted by NADH-consuming glycerol formation [101].

610

611 Activation of the branch pathways of the central carbon metabolism seen in *maf1Δ* is a hallmark of cancer cells  
612 that reprogram glycolytic activity towards synthesis of metabolites required in excess when cells rapidly divide.  
613 For instance, the PP pathway provides precursors for nucleotide and amino acid biosynthesis. This pathway,  
614 also referred to as a metabolic redox sensor, is important to maintain carbon homeostasis, is highly correlated  
615 to oncogenic, nutrient response signaling pathways [78,102–104] and is required for NADPH regeneration. It  
616 supports metabolic reconfiguration in rapidly proliferating cells, since NADPH is a ubiquitous cofactor for most  
617 anabolic reductive reactions and got scavenging of reactive oxygen species (ROS) that cause oxidative damage  
618 to DNA and proteins and which reduce protein synthesis [105,106]. ROS scavenging enzymes also increased in  
619 abundance in *maf1Δ*, suggesting a role of Maf1 in regulation of intracellular redox potential.

620

621 How is the glucose flux distributed in Maf1 deficient yeast cells? We propose scenario, build on our observation  
622 of the decreased levels of the allosteric activator of pyruvate kinase Cdc19. The reduced F16BP concentration  
623 in *maf1Δ* cells could adversely affect Cdc19 activity. The F16BP availability for binding [67–69], but not Cdc19  
624 abundance *per se* or phosphorylation, plays a predominant role in regulating the metabolic flux through the  
625 pyruvate kinase Cdc19 [70]. This may further lead to decrease in Cdc19 activity *in vivo* and pushing the  
626 glycolytic intermediated of lower glycolysis back to upper side branches of the pathway since lower  
627 PEP/pyruvate conversion, catalyzed by pyruvate kinase, favors accumulation of glycolytic intermediates,

628 refueling diverging anabolic pathways, such as the pentose phosphate pathway (PPP) and serine biosynthesis  
629 [64,107].

630

631 In our model, the glycolytic flux bypasses the steps in upper glycolysis between G6P and G3P, achieved *via*  
632 improved flux through PPP. This pathway operates in three modes, depending on a cell demand for metabolic  
633 intermediates and cofactors. To avoid extensive F16BP synthesis, which would improve cells survival, the flux  
634 should be directed towards glyceraldehydes (G3P) [4]. This scenario is supported by our observation of glycerol  
635 accumulation and no change in ethanol production in *maf1Δ* cells. This glucose flux redistribution towards the  
636 PPP shunt, amino acids and nucleotide biosynthesis, due to Cdc19 action has been reported for cancer cells  
637 [108]. Further, human fibroblasts exposed to hydrogen peroxide elicit enhanced carbon flow through upper  
638 glycolysis and the oxidative branch of PPP, causing reduction in lower glycolysis activity [109].

639

640 The characteristics of *maf1Δ* in central carbon metabolism is reminiscent of cancer proliferating mammalian  
641 cells which are stimulated in the early part of glycolysis *via* PI3K/AKT activation, and making glycolytic  
642 intermediates available for macromolecular synthesis due to the low-activity isoform of PK-M2 pyruvate kinase  
643 and producing NADPH due to mutated p53 tumor suppressor [107,108].

644

645 There are further similarities between *maf1Δ* and mammalian cells after oncogenic transformation. We noted  
646 increased potential for amino acid biosynthesis, including the arginine and leucine metabolic pathways. Arg  
647 and Leu are crucial for TORC1 signaling and activation of protein translation in yeast and higher eukaryotes.  
648 Leucine is the most frequently encoded amino acid in eukaryotic genomes and its levels are sensed by leucyl-  
649 tRNA synthetase to activate TORC1 kinase [110,111]. How yeast TORC1 integrates arginine signals is presently  
650 unknown. In mammals, arginine levels are communicated by two mechanisms, involving Rag GTPases  
651 mediating amino acids signals to control mTORC1 and by a cytoplasmic mechanism that involves arginine  
652 signaling by a sensor called CASTOR [112,113].

653

654 *maf1Δ* cells have also a strong enrichment in the branch of serine/cysteine, methionine biosynthesis pathway  
655 and in sulfate metabolism by contrast with *rpc128-1007* cells. Methionine biosynthesis is connected to tRNA  
656 quality control [114]. A crucial contribution of serine/glycine to cellular metabolism is through the glycine

657 cleavage system, which resupplies once carbon units for one-carbon metabolism. The importance of  
658 serine/glycine metabolism is emphasized by genetic and functional evidence indicating that hyperactivation of  
659 the serine/glycine biosynthetic pathway drives oncogenesis. During growth on a fermentable carbon source,  
660 most serine is derived from the phosphoglycerate-3P by the gene products Ser3 and Ser33. Ser3 is a cytosolic  
661 enzyme with the dual function of phosphoglycerate dehydrogenase and alpha-ketoglutarate reductase [115].  
662 Known for oxidizing 3-phosphoglycerate in the main serine biosynthesis pathway Ser3 also reduces alpha-  
663 ketoglutarate to D-2-hydroxyglutarate (D-2HG) using NADH, the major intracellular source of D-2HG in yeast.  
664 High levels of intracellular D-2HG are found in several types of cancer including gliomas and acute myelogenous  
665 leukemia [116].

666

667 RNAP III genes are not equally regulated by Maf1. Comparison of expression of selected tDNA genes in *maf1Δ*  
668 on glucose has revealed elevated tRNA<sup>Met</sup> levels [13]. Methionine is a proteinogenic amino acid. Over-  
669 expression of initiator methionine tRNA (tRNA<sup>Met</sup>) leads to reprogramming of tRNA expression and increased  
670 cell metabolic activity in *Drosophila* and proliferation in human epithelial cells [117,118]. Moreover,  
671 methionine metabolism influences genomic architecture via H3K4me3 histone methylation to alter chromatin  
672 dynamics and cancer associated gene expression [119]. Furthermore, high methionine metabolism and sulfur  
673 utilisation is intertwined with high Tkl1 transketolase activity, and is dependent on the non-oxidative phase of  
674 the PPP, Tkl1 abundance increased under our study in *maf1Δ* [120]. Methionine biosynthesis, *via* the  
675 assimilation of inorganic sulfate, requires three molecules of NADPH per molecule of methionine [80]. The data  
676 presented here suggest that efficient supply of NADPH derived from the PPP in *maf1*, may also support  
677 methionine biosynthesis in the mutant.

678

679 Finally, the proteomics data obtained here with glucose grown *maf1Δ*, suggest an alternative explanation to  
680 the reduced fitness of this strain on non-fermentable carbon sources. Down-regulation of *FBP1* transcription  
681 (26) is unlikely to be the major cause of *maf1Δ* lethality when grown on glycerol. The *FBP1* gene is expressed  
682 only in the absence of glucose, and even if it is not expressed under glucose rich condition that is, under this  
683 study the Fbp1 protein is still present in *maf1Δ* at wild-type levels. It is possible that the growth defect in  
684 *maf1Δ* on glycerol is due to decrease in abundance of the enzymes involved in the glyoxylate cycle.

685

686 In conclusion, global label-free profiling of enzymatic proteins in yeast has provided new insight in metabolic  
687 physiology. Protein abundance patterns characterized in the mutant strains that show different phenotypes on  
688 fermentable and non-fermentable carbon source highlighted metabolic pathways that could now be the target  
689 for further genetic or metabolic analysis. This work emphasises *S. cerevisiae* as a very good model organism for  
690 systems level studies on the dynamics of cellular networks. There is growing evidence for contradictory  
691 observations in cultured human cancer cells and in multicellular organisms including mouse models [100,119].  
692 We anticipate that yeast cells will continue to be appreciated as a source of basic biological information in  
693 building an integrated picture of metabolism and gene regulation.

694

## 695 **Conclusions**

- 696 ● The capacity of the glycolytic pathway can be altered by manipulation of RNAP III activity.
- 697 ● Lack of Maf1, the negative regulator of RNAP III driven non-coding RNA transcription, enhances glycolytic  
698 flux and results in accumulation of end products upstream of pyruvate.
- 699 ● Severe reduction in growth rate caused by RNAP III mutation *rpc128-1007* on glucose is correlated with a  
700 decrease in abundance of glycolytic enzymes.
- 701 ● The translation machinery in the *rpc128-1007* mutant seems to be selective towards mRNA coding for  
702 enzymes for amino acids synthesis *de novo* at the expense of full complement of glycolytic enzymes.
- 703 ● The critical decrease in abundance of glyoxylate cycle enzymes reduced the ability to convert non-  
704 fermentable substrates in *MAF1* knockdown yeast.

705

## 706 **Acknowledgments**

707 We want to thank Mark Johnston (Dept. of Biochemistry and Molecular Genetics, University of Colorado  
708 Denver, US) for providing *pBM2636* plasmid and Emil Furmanek for preparation of samples for proteomics  
709 analysis. We are grateful to Dr Philip Brownridge for excellent instrument support. This work was supported by  
710 National Science Centre, Poland grant 2012/05/E/NZ2/00583 to M.A. and by funding from Faculty of Chemistry,  
711 Warsaw University of Technology, Poland. I dedicate this work to my baby son Piotr.

712

713 **Figures captions**

714 **Fig 1. RNAP III regulation by Maf1 and Maf1 interaction network.**

715 A) RNAP III transcription repression is regulated by Maf1. Phosphorylation and dephosphorylation events are  
716 involved in the mobility and transportation of Maf1 through the nuclear membrane in which a group of protein  
717 kinases are involved in the control of Maf1 nuclear localisation responding to stress events. Maf1 produces  
718 transcriptional repression on RNAP III by inducing conformational changes. B) Maf1 protein-protein interaction  
719 network. Experimental interactions from STRING database are shown. Nodes have been coloured by protein  
720 activity in which different protein complexes related to tRNA modification and transportation can be observed.  
721 green: transcription regulation; *MAF1*: negative regulator of RNAP III, *SUB1*: Sub1 transcriptional regulator  
722 facilitating elongation through factors that modify RNAP II, role in hyper-osmotic stress response through  
723 RANP II and RNAP III, negatively regulates sporulation [121–123], *NOP1*: Nop1, histone glutamine  
724 methyltransferase, modifies H2A at Q105 in nucleolus that regulates transcription from the RNAP I promoter  
725 involved in C/D snoRNA 3'end processing. Essential gene leads to reduced levels of pre-rRNA species and  
726 defects in small ribosomal subunits biogenesis [124–126], *SUA7*: transcriptional factor TFIIIB, a general  
727 transcription factor required for transcription initiation and start site selection by RNAP II [127,128] - Sub1  
728 interaction with TFIIIB, [129]. Marine blue: RNAP III holoenzyme subunits, red: protein kinases, *KOG1*: Kog1 the  
729 component of the TPR complex, Kog1 depletion display the starvation-like phenotypes- cell growth arrest,  
730 reduction in protein synthesis, glycogen accumulation, upregulation in the transcription of nitrogen catabolite  
731 repressed and retrograde responses genes conserved in from yeast to man is the homolog of the mammalian  
732 TORC1 regulatory protein RAPTOR/mKOG1 [82,130], TOR1 mediates cell growth in response to nutrient  
733 availability and cellular stress by regulating protein synthesis, ribosome biogenesis, autophagy, transcription  
734 activation cell cycle [131,132] yellow: PKA kinase inhibitor protein *BCY1*, pink: tRNA modification *TAN1*: tRNA  
735 modifying proteins Tan1 (responsible for tRNA<sup>SER</sup> turnover [133]), *TRM1*: Trm1 tRNA methyltransferase  
736 produces modified base N2, n2 dimethylguanosine in tRNA in nucleus and mitochondrion [134], *PUS1*: *PUS1*  
737 associated with human disease [135], introduces pseudouridines in tRNA , also as on *U2* snRNA and  
738 pseudouridylation of some mRNA [136,137]. ),blue: RPC40 (AC40) is a common subunit to RNAP I and III  
739 conserve in all eukaryotes [138,139] light blue: *RPO21*: largest subunit of RNAP II, which produces all nuclear

740 mRNAs, most snoRNAs and snRNA and the telomerase RNA encoded by *TLC1* [140,141], (according to  
741 Saccharomyces Genome Database).

742

743 **Fig 2. Proteome signature of *maf1Δ* and *rpc128-1007* mutants compared to wild-type strain.**

744 A) Histogram of proteins present on both mutants organized according to their corresponding Log<sub>2</sub> fold change  
745 expression. B) Comparative scatter plots and histograms of the different strains. The Log<sub>2</sub> transformed protein  
746 abundances of proteins present in the WT, *rpc128-1007* and *maf1 Δ* strains are plotted against one another  
747 along with their distribution. The number shown is the Pearson correlation coefficient between the two  
748 relevant strains. C) Principal component analysis (PCA) based on proteins present on all biological replicates.

749

750 **Fig 3. Increased and decreased protein abundance is presented relative to the wild-type strain for both**  
751 ***maf1Δ* and *rpc128-1007* mutants.**

752 All those statically significant proteins with an adjusted *p*-value < 0.05 overlapped between both comparison  
753 were then subjected to a hierarchical clustering. This clustering analysis created different groups showing the  
754 similarities and differences between both mutants with clusters enriching to biological processes related to  
755 amino acid and carbohydrate metabolism, response to stress, and respiratory processes.

756

757 **Fig 4. Comparative proteomic profiling of *maf1Δ* and *rpc128-1007* mutants when compared to wild-type**  
758 **strain.**

759 The differences in protein abundances are presented on a schematic representation of the central carbon  
760 metabolism. Those proteins with an increased abundance are presented in red and those with a decreased  
761 abundance in green.

762

763 **Fig 5. Opposite effects have been observed in *HXT1* promoter activity in strains with altered RNAP III**

764 (A) Schematic representation of glucose uptake and phosphorylation in yeast cells. Hxt – hexose transporter, P  
765 – phosphorylation, Hxk1 – hexokinase 1, Hxk2 – hexokinase 2, Glk1 – glucokinase 1. WT, *maf1Δ*, *rpc128-1007*  
766 yeast cells and single or double *HXK1*, *HXK2*, *GLK1* knockouts strains in WT, *maf1Δ* and *rpc128-1007* genetic  
767 background were cultured in YPD (C) or YPGly (D) rich medium under either inducing (2% glucose) or repressing

768 (2% glycerol) conditions. Maf1 deficiency increases *HXT1* expression (B) on glucose and Hxk2 activity regardless  
769 carbon source (C, D). Metabolic effects observed in *rpc128-1007* correlate with decreased *HXT1* expression (B)  
770 and decreased hexokinase activity in glucose rich medium (C), but increased hexokinase activity in glycerol rich  
771 medium (D). Compromised RNAP III and *maf1Δ* have effect on enzymes in lower glycolysis: Tdh and Cdc19  
772 activities (E and F). The WT strain (MB159-4D), *maf1Δ* and *rpc128-1007* mutant strains were grown under 2%  
773 glucose and 2% glycerol conditions. The experiment was performed in cell-free extracts isolated from the  
774 aforementioned strains. Data are expressed as the mean obtained from at least three independent  
775 experiments measured in triplicate. The + standard deviations are shown. Enzymatic assays were performed in  
776 cell-free extracts. The reaction rates were monitored by measuring NADH concentration change over time at  
777 340 nm.  $V_{max}$  mean value is expressed as  $\mu\text{mol}\cdot\text{min}^{-1}\cdot\text{mg}^{-1}$  protein (C, D, E, F). (B) *HXT1* expression was  
778 measured in WT [pBM2636], *maf1Δ* [pBM2636] and *rpc128-1007* [pBM2636] strains by using the *lacZ* reporter  
779 gene system [40].  $\beta$ -galactosidase activity was assayed in cell-free extracts. The error bars indicate the standard  
780 deviation from three independent transformants assayed in triplicate. Asterix (\*) indicate  $p$ -value  $< 0.05$  and  
781 double asterix (\*\*) illustrate  $p$ -values  $< 0.1$  according to t-student test.

782

### 783 **Fig 6. Changes in intracellular concentration of Fructose 1,6 bisphosphate (F16BP).**

784 Intracellular fructose 1,6 bisphosphate concentration is lowered in cells with changed RNAP III activity under  
785 glucose pulse experiment. Cells were grown in YPD until reaching  $A_{600} \approx 1.0$ , collected washed in minimal  
786 medium lacking carbon source (CBS-C) and resuspended in CBS (-C). Analysis was performed in a thermostatted  
787 vessel at 30°C. Cells were flushed with  $\text{Ar}_2$  gas and glucose was added to a final concentration of 2%. Cell  
788 samples suspension were collected in time. Fructose 1,6 bisphosphate content was measured by enzymatic  
789 breakdown of NADH monitored by changed absorbance at 340 nm in time according to [4]. Fructose 1,6BP  
790 concentration was calculated from a standard curve and standardized to cells dry weight expressed in g.  
791 Results are shown as mean value for four biological replicates.

792

### 793 **Fig 7. Maf1 deficient yeast strain accumulates glycogen (A) and trehalose (B) during exponential phase.**

794 Yeast were cultivated in rich medium supplemented with 2% glucose and harvested by centrifugation at  $A_{600} \approx$   
795 1.0. Glucose concentration from enzymatic breakdown of glycogen (A) by amyloglucosidase from *A. niger*, was  
796 determined by Glucose (HK) Assay Kit (GAHK-20, Sigma). Trehalose (B) content determination assay was



797 performed using Trehalose Assay Kit (Megazyme) according to manufacturer's protocol. Trehalose and  
798 glycogen content is presentment as mean value of at least three independent biological replicates with  
799 standard deviations. There were no significant changes in ethanol production rate between wild-type (MB159-  
800 4D) and *maf1Δ* strain (C). *maf1Δ* accumulated glycerol (D). Ethanol and glycerol concentration was determined  
801 under Fermentative capacity assay (FCA) conditions in *maf1Δ* strain (C and D). Fermentative capacity assay was  
802 performed as described by van Hoek *et al.* (1998) [49] with modifications (for details see Method section). All  
803 assays were performed in triplicates. Results are shown as mean concentration [g/L] value with standard  
804 deviation in time [min]. 'C-limited' stands for 'carbon-limited conditions'. Asterisk (\*) indicate *p*-value < 0.05 and  
805 double asterix (\*\*) illustrate *p*-values < 0.1 according to t-student test.

806

807 **Fig 8. Amino acid biosynthesis and associated proteome signature.**

808 Abundance protein patterns for amino acid metabolism are presented showing those proteins with and  
809 increased abundance in red and those with an decreased abundance in green.

810

811 **Fig 9. *GCN4* transcripts and Gcn4 protein relative levels are significantly increased *rpc128-1007* yeast cells  
812 and moderately in *maf1Δ* cells.**

813 Yeast cells were grown in rich medium supplemented with 2% glucose until reached exponential growth phase  
814 ( $A_{600} \approx 1.0$ ). SYBER-Green based Real-Time PCR (A) showed that *GCN4* transcript increased 2-fold in *maf1Δ* and  
815 by 11-fold in *rpc128-1007*. Wild-type strain expression level was taken as 1.0. Samples were normalized to two  
816 reference genes - *U2* spliceosomal RNA (*U2*) and small cytosolic RNA (*SCR1*). Asterisk (\*) indicates *p*-values  
817 lowered than 0.05 according to t-student test. Western blotting assay (B) showed increased stability of Gcn4-  
818 3HA protein in *maf1Δ* and *rpc128-1007* mutant strains expressing chromosomally encoded Gcn4-3HA. Total cell  
819 protein extracts were subjected to SDS-PAGE and examined by Western blotting with anti-HA antibodies (B).  
820 Quantitative relative level of Gcn4-3HA protein in comparison to yeast Vma2 protein level was calculated for at  
821 least three independent biological replicates (C).

822

823 **Fig 10. Transcription factor enrichment analysis.**

824 Enrichment in the proteome sets for individual transcription factors was calculated using the GeneCodis  
825 website taking the sets of proteins with an adjusted *p*-value of < 0.05 from both strains *maf1Δ* and *rpc128-1007*

826 compared against the wild-type. Proteins were classified according to their positive or negative fold change and  
827 the background set consisted of all proteins identified in the given MS experiment.

828

829 **Fig 11. Proposed model of carbon flow in *rpc128-1007* and *maf1Δ* yeast cells.**

830 Altered RNAP III activity affects carbon flux. Low activity of RNAP III in *rpc128-1007* strain is correlated with  
831 decreased carbon flow through glycolysis in comparison to reference strain. By contrast, *maf1Δ* cells  
832 demonstrate increased carbon flow through hexokinase step and lower glycolysis compared to the control  
833 strain. In *maf1Δ*, excess glucose-6-P (G6P) is redirected into PPP and trehalose and glycogen biosynthesis. As a  
834 result fructose 1,6 bisphosphate (F16BP) concentration decreases in *maf1Δ*. From the increased glycerol  
835 concentration, carbon flux is partially redirected towards upper glycolysis at PEP. Green: decrease in carbon  
836 flux; Red: increase in carbon flux. Legend: glucose-6-phosphate (G6P); fructose-6-phosphate (F6P); fructose 1,6  
837 bisphosphate (F16BP); dihydroxyacetone phosphate (DHAP); glyceraldehyde-3-phosphate (G3P); 6-  
838 phosphogluconate (6PG); ribose 5-phosphate (R5P); 3-phosphoglyceric acid (3PG); phosphoenolpyruvate (PEP).

839

840

841

## 842 **References**

- 843 1. Otterstedt K, Larsson C, Bill RM, Ståhlberg A, Boles E, Hohmann S, et al. Switching the mode of  
844 metabolism in the yeast *Saccharomyces cerevisiae*. *EMBO Rep.* 2004 May;5(5):532–7.
- 845 2. Dechant R, Binda M, Lee SS, Pelet S, Winderickx J, Peter M. Cytosolic pH is a second messenger for  
846 glucose and regulates the PKA pathway through V-ATPase. *EMBO J.* 2010 Aug 4;29(15):2515–26.
- 847 3. Zhang C-S, Hawley SA, Zong Y, Li M, Wang Z, Gray A, et al. Fructose-1,6-bisphosphate and aldolase  
848 mediate glucose sensing by AMPK. *Nature.* 2017 Aug 3;548(7665):112–6.
- 849 4. Peeters K, Van FL, Fischer B, Bonini BM, Quezada H, Tsytlonok M, et al. Fructose-1,6-bisphosphate  
850 couples glycolytic flux to activation of Ras., Fructose-1,6-bisphosphate couples glycolytic flux to activation of  
851 Ras. *Nat Commun.* 2017;8, 8(1):922–922.
- 852 5. Mitchison JM. *The Biology of the Cell Cycle*. CUP Archive; 1971. 324 p.
- 853 6. Elliott SG, McLaughlin CS. Rate of macromolecular synthesis through the cell cycle of the yeast  
854 *Saccharomyces cerevisiae*. *Proc Natl Acad Sci U S A.* 1978 Sep;75(9):4384–8.
- 855 7. Polymenis M, Aramayo R. Translate to divide: control of the cell cycle by protein synthesis. *Microb*  
856 *Cell.* 2015 Mar 20;2(4):94–104.
- 857 8. Waldron C. Synthesis of Ribosomal and Transfer Ribonucleic Acids in Yeast During a Nutritional Shift-  
858 up. *Journal of General Microbiology.* 1977 Jan 1;98(1):215–21.
- 859 9. Kief DR, Warner JR. Coordinate control of syntheses of ribosomal ribonucleic acid and ribosomal  
860 proteins during nutritional shift-up in *Saccharomyces cerevisiae*. *Molecular and Cellular Biology.* 1981  
861 Nov;1(11):1007–15.
- 862 10. Boguta M, Czerska K, Zoładek T. Mutation in a new gene MAF1 affects tRNA suppressor efficiency in  
863 *Saccharomyces cerevisiae*. *Gene.* 1997 Feb 7;185(2):291–6.
- 864 11. Pluta K, Lefebvre O, Martin NC, Smagowicz WJ, Stanford DR, Ellis SR, et al. Maf1p, a Negative Effector  
865 of RNA Polymerase III in *Saccharomyces cerevisiae*. *Mol Cell Biol.* 2001 Aug;21(15):5031–40.
- 866 12. Upadhyya R, Lee J, Willis JM. Maf1 Is an Essential Mediator of Diverse Signals that Repress RNA  
867 Polymerase III Transcription. *Molecular Cell.* 2002 Dec;10(6):1489–94.
- 868 13. Cieśła M, Towpik J, Graczyk D, Oficjalska-Pham D, Harismendy O, Suleau A, et al. Maf1 Is Involved in  
869 Coupling Carbon Metabolism to RNA Polymerase III Transcription. *Mol Cell Biol.* 2007 Nov;27(21):7693–702.

- 870 14. Vannini A, Ringel R, Kusser AG, Berninghausen O, Kassavetis GA, Cramer P. Molecular Basis of RNA  
871 Polymerase III Transcription Repression by Maf1. *Cell*. 2010 Oct;143(1):59–70.
- 872 15. Oficjalska-Pham D, Harismendy O, Smagowicz WJ, Gonzalez de Peredo A, Boguta M, Sentenac A, et al.  
873 General repression of RNA polymerase III transcription is triggered by protein phosphatase type 2A-mediated  
874 dephosphorylation of Maf1. *Mol Cell*. 2006 Jun 9;22(5):623–32.
- 875 16. Zaragoza O, Gancedo JM. Elements from the cAMP signaling pathway are involved in the control of  
876 expression of the yeast gluconeogenic gene *FBP1*. *FEBS Lett*. 2001 Oct 12;506(3):262–6.
- 877 17. Harismendy O, Gendrel C-G, Soularue P, Gidrol X, Sentenac A, Werner M, et al. Genome-wide location  
878 of yeast RNA polymerase III transcription machinery. *EMBO J*. 2003 Sep 15;22(18):4738–47.
- 879 18. Reina JH, Azzouz TN, Hernandez N. Maf1, a New Player in the Regulation of Human RNA Polymerase III  
880 Transcription. *PLOS ONE*. 2006 Dec 27;1(1):e134.
- 881 19. Desai N, Lee J, Upadhya R, Chu Y, Moir RD, Willis IM. Two Steps in Maf1-dependent Repression of  
882 Transcription by RNA Polymerase III. *J Biol Chem*. 2005 Feb 25;280(8):6455–62.
- 883 20. Moir RD, Lee J, Haeusler RA, Desai N, Engelke DR, Willis IM. Protein kinase A regulates RNA polymerase  
884 III transcription through the nuclear localization of Maf1. *Proc Natl Acad Sci USA*. 2006 Oct 10;103(41):15044–9.
- 885 21. Roberts DN, Wilson B, Huff JT, Stewart AJ, Cairns BR. Dephosphorylation and genome-wide association  
886 of Maf1 with Pol III-transcribed genes during repression. *Mol Cell*. 2006 Jun 9;22(5):633–44.
- 887 22. Boisnard S, Lagniel G, Garmendia-Torres C, Molin M, Boy-Marcotte E, Jacquet M, et al. H<sub>2</sub>O<sub>2</sub> activates  
888 the nuclear localization of Msn2 and Maf1 through thioredoxins in *Saccharomyces cerevisiae*. *Eukaryotic Cell*.  
889 2009 Sep;8(9):1429–38.
- 890 23. Lee J, Moir RD, Willis IM. Regulation of RNA Polymerase III Transcription Involves SCH9-dependent  
891 and SCH9-independent Branches of the Target of Rapamycin (TOR) Pathway. *J Biol Chem*. 2009 May  
892 8;284(19):12604–8.
- 893 24. Wei Y, Tsang CK, Zheng XFS. Mechanisms of regulation of RNA polymerase III-dependent transcription  
894 by TORC1. *EMBO J*. 2009 Aug 5;28(15):2220–30.
- 895 25. Graczyk D, Debski J, Muszyńska G, Bretner M, Lefebvre O, Boguta M. Casein kinase II-mediated  
896 phosphorylation of general repressor Maf1 triggers RNA polymerase III activation. *Proc Natl Acad Sci USA*. 2011  
897 Mar 22;108(12):4926–31.

- 898 26. Morawiec E, Wichtowska D, Graczyk D, Conesa C, Lefebvre O, Boguta M. Maf1, repressor of tRNA  
899 transcription, is involved in the control of gluconeogenic genes in *Saccharomyces cerevisiae*. *Gene*. 2013  
900 Aug;526(1):16–22.
- 901 27. Adamczyk M, Szatkowska R. Low RNA Polymerase III activity results in up regulation of HXT2 glucose  
902 transporter independently of glucose signaling and despite changing environment. *PLOS ONE*. 2017 Sep  
903 29;12(9):e0185516.
- 904 28. Kwapisz M, Smagowicz WJ, Oficjalska D, Hatin I, Rousset J-P, Żołądek T, et al. Up-regulation of tRNA  
905 biosynthesis affects translational readthrough in *maf1-Δ* mutant of *Saccharomyces cerevisiae*. *Curr Genet*. 2002  
906 Dec 1;42(3):147–52.
- 907 29. Longtine MS, Mckenzie III A, Demarini DJ, Shah NG, Wach A, Brachat A, et al. Additional modules for  
908 versatile and economical PCR-based gene deletion and modification in *Saccharomyces cerevisiae*. *Yeast*. 1998  
909 Jul 1;14(10):953–61.
- 910 30. Gietz RD, Schiestl RH. Large-scale high-efficiency yeast transformation using the LiAc/SS carrier  
911 DNA/PEG method. *Nat Protocols*. 2007 Jan;2(1):38–41.
- 912 31. Bradford MM. A rapid and sensitive method for the quantitation of microgram quantities of protein  
913 utilizing the principle of protein-dye binding. *Analytical Biochemistry*. 1976 May;72(1):248–54.
- 914 32. Cox J, Mann M. MaxQuant enables high peptide identification rates, individualized p.p.b.-range mass  
915 accuracies and proteome-wide protein quantification. *Nat Biotech*. 2008 Dec;26(12):1367–72.
- 916 33. Choi M, Chang C-Y, Clough T, Broudy D, Killeen T, MacLean B, et al. MSstats: an R package for  
917 statistical analysis of quantitative mass spectrometry-based proteomic experiments. *Bioinformatics*. 2014 Sep  
918 1;30(17):2524–6.
- 919 34. Mi H, Muruganujan A, Thomas PD. PANTHER in 2013: modeling the evolution of gene function, and  
920 other gene attributes, in the context of phylogenetic trees. *Nucleic Acids Res*. 2013 Jan;41(Database  
921 issue):D377–86.
- 922 35. Kanehisa M, Furumichi M, Tanabe M, Sato Y, Morishima K. KEGG: new perspectives on genomes,  
923 pathways, diseases and drugs. *Nucleic Acids Res*. 2017 Jan 4;45(Database issue):D353–61.
- 924 36. Jensen LJ, Kuhn M, Stark M, Chaffron S, Creevey C, Muller J, et al. STRING 8—a global view on proteins  
925 and their functional interactions in 630 organisms. *Nucleic Acids Res*. 2009 Jan;37(Database issue):D412–6.

- 926 37. Shannon P, Markiel A, Ozier O, Baliga NS, Wang JT, Ramage D, et al. Cytoscape: A Software  
927 Environment for Integrated Models of Biomolecular Interaction Networks. *Genome Res.* 2003 Nov  
928 1;13(11):2498–504.
- 929 38. Carmona-Saez P, Chagoyen M, Tirado F, Carazo JM, Pascual-Montano A. GENECODIS: a web-based tool  
930 for finding significant concurrent annotations in gene lists. *Genome Biol.* 2007;8(1):R3.
- 931 39. Cankorur-Cetinkaya A, Dereli E, Eraslan S, Karabekmez E, Dikicioglu D, Kirdar B. A Novel Strategy for  
932 Selection and Validation of Reference Genes in Dynamic Multidimensional Experimental Design in Yeast. *PLoS*  
933 *One.* 2012 Jun 4;7(6).
- 934 40. Ozcan S, Johnston M. Three different regulatory mechanisms enable yeast hexose transporter (HXT)  
935 genes to be induced by different levels of glucose. *Mol Cell Biol.* 1995 Mar;15(3):1564–72.
- 936 41. Adamczyk M, van Eunen K, Bakker BM, Westerhoff HV. Enzyme Kinetics for Systems Biology. *Methods*  
937 *in Enzymology.* 2011 Jan 1;500:233–57.
- 938 42. De Winde JH, Crauwels M, Hohmann S, Thevelein JM, Winderickx J. Differential requirement of the  
939 yeast sugar kinases for sugar sensing in establishing the catabolite-repressed state. *Eur J Biochem.* 1996 Oct  
940 15;241(2):633–43.
- 941 43. Grüning N-M, Rinnerthaler M, Bluemlein K, Mülleder M, Wamelink MMC, Lehrach H, et al. Pyruvate  
942 Kinase Triggers a Metabolic Feedback Loop that Controls Redox Metabolism in Respiring Cells. *Cell Metab.* 2011  
943 Sep 7;14(3):415–27.
- 944 44. Postma E, Verduyn C, Scheffers WA, Dijken JPV. Enzymic analysis of the crabtree effect in glucose-  
945 limited chemostat cultures of *Saccharomyces cerevisiae*. *Applied and Environmental Microbiology.* 1989  
946 Feb;55(2):468.
- 947 45. Smale ST. Beta-galactosidase assay. *Cold Spring Harb Protoc.* 2010 May;2010(5):pdb.prot5423.
- 948 46. Beers RF, Sizer IW. A spectrophotometric method for measuring the breakdown of hydrogen peroxide  
949 by catalase. *J Biol Chem.* 1952 Mar;195(1):133–40.
- 950 47. Rossouw D, Heyns EH, Setati ME, Bosch S, Bauer FF. Adjustment of Trehalose Metabolism in Wine  
951 *Saccharomyces cerevisiae* Strains To Modify Ethanol Yields. *Appl Environ Microbiol.* 2013 Sep 1;79(17):5197–  
952 207.
- 953 48. Parrou JL, François J. A Simplified Procedure for a Rapid and Reliable Assay of both Glycogen and  
954 Trehalose in Whole Yeast Cells. *Analytical Biochemistry.* 1997 May 15;248(1):186–8.

- 955 49. Van Hoek P, Van Dijken JP, Pronk JT. Effect of Specific Growth Rate on Fermentative Capacity of  
956 Baker's Yeast. *Appl Environ Microbiol.* 1998 Nov;64(11):4226–33.
- 957 50. Picotti P, Bodenmiller B, Mueller LN, Domon B, Aebersold R. Full dynamic range proteome analysis of  
958 *S. cerevisiae* by targeted proteomics. *Cell.* 2009 Aug 21;138(4):795–806.
- 959 51. Feng Y, De Franceschi G, Kahraman A, Soste M, Melnik A, Boersema PJ, et al. Global analysis of protein  
960 structural changes in complex proteomes. *Nat Biotechnol.* 2014 Oct;32(10):1036–44.
- 961 52. Carlson M. Glucose repression in yeast. *Current Opinion in Microbiology.* 1999 Apr 1;2(2):202–7.
- 962 53. Young ET, Dombek KM, Tachibana C, Ideker T. Multiple Pathways Are Co-regulated by the Protein  
963 Kinase Snf1 and the Transcription Factors Adr1 and Cat8. *J Biol Chem.* 2003 Jul 11;278(28):26146–58.
- 964 54. Wendell DL, Bisson LF. Expression of high-affinity glucose transport protein Hxt2p of *Saccharomyces*  
965 *cerevisiae* is both repressed and induced by glucose and appears to be regulated posttranslationally. *J*  
966 *Bacteriol.* 1994 Jun;176(12):3730–7.
- 967 55. Galazzo JL, Bailey JE. Growing *Saccharomyces cerevisiae* in calcium-alginate beads induces cell  
968 alterations which accelerate glucose conversion to ethanol. *Biotechnology and Bioengineering.* 1990 Aug  
969 5;36(4):417–26.
- 970 56. Rolland F, Winderickx J, Thevelein JM. Glucose-sensing and -signalling mechanisms in yeast. *FEMS*  
971 *Yeast Research.* 2002 May;2(2):183–201.
- 972 57. Elbing K, Larsson C, Bill RM, Albers E, Snoep JL, Boles E, et al. Role of hexose transport in control of  
973 glycolytic flux in *Saccharomyces cerevisiae*. *Appl Environ Microbiol.* 2004 Sep;70(9):5323–30.
- 974 58. Guillaume C, Delobel P, Sablayrolles J-M, Blondin B. Molecular Basis of Fructose Utilization by the Wine  
975 Yeast *Saccharomyces cerevisiae*: a Mutated HXT3 Allele Enhances Fructose Fermentation. *Appl Environ*  
976 *Microbiol.* 2007 Apr;73(8):2432–9.
- 977 59. Lane S, Xu H, Oh EJ, Kim H, Lesmana A, Jeong D, et al. Glucose repression can be alleviated by reducing  
978 glucose phosphorylation rate in *Saccharomyces cerevisiae*. *Scientific Reports.* 2018 Feb 8;8(1):2613.
- 979 60. Herrero P, Galíndez J, Ruiz N, Martínez-Campa C, Moreno F. Transcriptional regulation of the  
980 *Saccharomyces cerevisiae* HXK1, HXK2 and GLK1 genes. *Yeast.* 1995 Feb;11(2):137–44.
- 981 61. Bakker BM, Walsh MC, ter Kuile BH, Mensonides FIC, Michels PAM, Opperdoes FR, et al. Contribution  
982 of glucose transport to the control of the glycolytic flux in *Trypanosoma brucei*. *Proc Natl Acad Sci U S A.* 1999  
983 Aug 31;96(18):10098–103.

- 984 62. Shestov AA, Liu X, Ser Z, Cluntun AA, Hung YP, Huang L, et al. Quantitative determinants of aerobic  
985 glycolysis identify flux through the enzyme GAPDH as a limiting step. *Elife*. 2014 Jul 9;3.
- 986 63. Pearce AK, Crimmins K, Groussac E, Hewlins MJE, Dickinson JR, Francois J, et al. Pyruvate kinase (Pyk1)  
987 levels influence both the rate and direction of carbon flux in yeast under fermentative conditions.  
988 *Microbiology*. 2001;147(2):391–401.
- 989 64. Zampar GG, Kümmel A, Ewald J, Jol S, Niebel B, Picotti P, et al. Temporal system-level organization of  
990 the switch from glycolytic to gluconeogenic operation in yeast. *Mol Syst Biol*. 2013 Apr 2;9:651.
- 991 65. Zheng L, Roeder RG, Luo Y. S Phase Activation of the Histone H2B Promoter by OCA-S, a Coactivator  
992 Complex that Contains GAPDH as a Key Component. *Cell*. 2003 Jul 25;114(2):255–66.
- 993 66. White MR, Garcin ED. The sweet side of RNA regulation: glyceraldehyde-3-phosphate dehydrogenase  
994 as a noncanonical RNA-binding protein. *Wiley Interdiscip Rev RNA*. 2016;7(1):53–70.
- 995 67. Blair JB, Walker RG. Rat liver pyruvate kinase: influence of ligands on activity and fructose 1,6-  
996 bisphosphate binding. *Arch Biochem Biophys*. 1984 Jul;232(1):202–13.
- 997 68. Jurica MS, Mesecar A, Heath PJ, Shi W, Nowak T, Stoddard BL. The allosteric regulation of pyruvate  
998 kinase by fructose-1,6-bisphosphate. *Structure*. 1998 Feb 15;6(2):195–210.
- 999 69. Dombrauckas JD, Santarsiero BD, Mesecar AD. Structural basis for tumor pyruvate kinase M2 allosteric  
1000 regulation and catalysis. *Biochemistry*. 2005 Jul 12;44(27):9417–29.
- 1001 70. Xu Y-F, Zhao X, Glass DS, Absalan F, Perlman DH, Broach JR, et al. Regulation of yeast pyruvate kinase  
1002 by ultrasensitive allostery independent of phosphorylation. *Mol Cell*. 2012 Oct 12;48(1):52–62.
- 1003 71. Apweiler E, Sameith K, Margaritis T, Brabers N, van de Pasch L, Bakker LV, et al. Yeast glucose  
1004 pathways converge on the transcriptional regulation of trehalose biosynthesis. *BMC Genomics*. 2012 Jun  
1005 14;13:239.
- 1006 72. Hohmann S, Bell W, Neves MJ, Valckx D, Thevelein JM. Evidence for trehalose-6-phosphate-  
1007 dependent and -independent mechanisms in the control of sugar influx into yeast glycolysis. *Molecular*  
1008 *Microbiology*. 1996 Jun 1;20(5):981–91.
- 1009 73. Teusink B, Walsh MC, van Dam K, Westerhoff HV. The danger of metabolic pathways with turbo  
1010 design. *Trends Biochem Sci*. 1998 May;23(5):162–9.
- 1011 74. Heerden JH van, Wortel MT, Bruggeman FJ, Heijnen JJ, Bollen YJM, Planqué R, et al. Lost in Transition:  
1012 Start-Up of Glycolysis Yields Subpopulations of Nongrowing Cells. *Science*. 2014 Feb 28;343(6174):1245114.



- 1013 75. Shulman RG, Rothman DL. Homeostasis and the glycogen shunt explains aerobic ethanol production in  
1014 yeast. PNAS. 2015 Sep 1;112(35):10902–7.
- 1015 76. Blázquez MA, Lagunas R, Gancedo C, Gancedo JM. Trehalose-6-phosphate, a new regulator of yeast  
1016 glycolysis that inhibits hexokinases. FEBS Letters. 1993 Aug;329(1):51–4.
- 1017 77. Gancedo C, Flores C-L. The importance of a functional trehalose biosynthetic pathway for the life of  
1018 yeasts and fungi. FEMS Yeast Res. 2004 Jan;4(4–5):351–9.
- 1019 78. Krüger A, Grüning N-M, Wamelink MMC, Kerick M, Kirpy A, Parkhomchuk D, et al. The pentose  
1020 phosphate pathway is a metabolic redox sensor and regulates transcription during the antioxidant response.  
1021 Antioxid Redox Signal. 2011 Jul 15;15(2):311–24.
- 1022 79. Stanton RC. Glucose-6-Phosphate Dehydrogenase, NADPH, and Cell Survival. IUBMB Life. 2012  
1023 May;64(5):362–9.
- 1024 80. Stincone A, Prigione A, Cramer T, Wamelink MMC, Campbell K, Cheung E, et al. The return of  
1025 metabolism: biochemistry and physiology of the pentose phosphate pathway. Biol Rev Camb Philos Soc. 2015  
1026 Aug;90(3):927–63.
- 1027 81. Hinnebusch AG. Translational regulation of GCN4 and the general amino acid control of yeast. Annu  
1028 Rev Microbiol. 2005;59:407–50.
- 1029 82. Loewith R, Hall MN. Target of Rapamycin (TOR) in Nutrient Signaling and Growth Control. Genetics.  
1030 2011 Dec;189(4):1177–201.
- 1031 83. Natarajan K, Meyer MR, Jackson BM, Slade D, Roberts C, Hinnebusch AG, et al. Transcriptional profiling  
1032 shows that Gcn4p is a master regulator of gene expression during amino acid starvation in yeast. Mol Cell Biol.  
1033 2001 Jul;21(13):4347–68.
- 1034 84. Conesa C, Ruotolo R, Soularue P, Simms TA, Donze D, Sentenac A, et al. Modulation of yeast genome  
1035 expression in response to defective RNA polymerase III-dependent transcription. Mol Cell Biol. 2005  
1036 Oct;25(19):8631–42.
- 1037 85. Chou H-J, Donnard E, Gustafsson HT, Garber M, Rando OJ. Transcriptome-wide Analysis of Roles for  
1038 tRNA Modifications in Translational Regulation. Mol Cell. 2017 Dec 7;68(5):978-992.e4.
- 1039 86. Vilela C, Linz B, Rodrigues-Pousada C, McCarthy JE. The yeast transcription factor genes YAP1 and YAP2  
1040 are subject to differential control at the levels of both translation and mRNA stability. Nucleic Acids Res. 1998  
1041 Mar 1;26(5):1150–9.

- 1042 87. Filer D, Thompson MA, Takhaveev V, Dobson AJ, Kotronaki I, Green JWM, et al. RNA polymerase III  
1043 limits longevity downstream of TORC1. *Nature*. 2017 Dec 14;552(7684):263–7.
- 1044 88. Mannhaupt G, Schnall R, Karpov V, Vetter I, Feldmann H. Rpn4p acts as a transcription factor by  
1045 binding to PACE, a nonamer box found upstream of 26S proteasomal and other genes in yeast. *FEBS Lett*. 1999  
1046 Apr 30;450(1–2):27–34.
- 1047 89. Xie Y, Varshavsky A. RPN4 is a ligand, substrate, and transcriptional regulator of the 26S proteasome: a  
1048 negative feedback circuit. *Proc Natl Acad Sci USA*. 2001 Mar 13;98(6):3056–61.
- 1049 90. Harding HP, Novoa I, Zhang Y, Zeng H, Wek R, Schapira M, et al. Regulated translation initiation  
1050 controls stress-induced gene expression in mammalian cells. *Mol Cell*. 2000 Nov;6(5):1099–108.
- 1051 91. Li Y, Moir RD, Sethy-Coraci IK, Warner JR, Willis IM. Repression of Ribosome and tRNA Synthesis in  
1052 Secretion-Defective Cells Is Signaled by a Novel Branch of the Cell Integrity Pathway. *Mol Cell Biol*. 2000  
1053 Jun;20(11):3843–51.
- 1054 92. Upadhyya R, Lee J, Willis IM. Maf1 is an essential mediator of diverse signals that repress RNA  
1055 polymerase III transcription. *Mol Cell*. 2002 Dec;10(6):1489–94.
- 1056 93. Yin Z, Wilson S, Hauser NC, Tournu H, Hoheisel JD, Brown AJP. Glucose triggers different global  
1057 responses in yeast, depending on the strength of the signal, and transiently stabilizes ribosomal protein  
1058 mRNAs. *Mol Microbiol*. 2003 May;48(3):713–24.
- 1059 94. Oliveira AP, Ludwig C, Picotti P, Kogadeeva M, Aebersold R, Sauer U. Regulation of yeast central  
1060 metabolism by enzyme phosphorylation. *Mol Syst Biol*. 2012 Nov 13;8:623.
- 1061 95. Barbosa AD, Pereira C, Osório H, Moradas-Ferreira P, Costa V. The ceramide-activated protein  
1062 phosphatase Sit4p controls lifespan, mitochondrial function and cell cycle progression by regulating hexokinase  
1063 2 phosphorylation. *Cell Cycle*. 2016 May 10;15(12):1620–30.
- 1064 96. Ihmels JH, Bergmann S. Challenges and prospects in the analysis of large-scale gene expression data.  
1065 *Brief Bioinformatics*. 2004 Dec;5(4):313–27.
- 1066 97. François J, Parrou JL. Reserve carbohydrates metabolism in the yeast *Saccharomyces cerevisiae*. *FEMS*  
1067 *Microbiology Reviews*. 2001 Jan;25(1):125–45.
- 1068 98. Ptacek J, Devgan G, Michaud G, Zhu H, Zhu X, Fasolo J, et al. Global analysis of protein phosphorylation  
1069 in yeast. *Nature*. 2005 Dec;438(7068):679–84.

- 1070 99. Marín-Hernández A, Rodríguez-Enríquez S, Vital-González PA, Flores-Rodríguez FL, Macías-Silva M,  
1071 Sosa-Garrocho M, et al. Determining and understanding the control of glycolysis in fast-growth tumor cells.  
1072 Flux control by an over-expressed but strongly product-inhibited hexokinase. FEBS J. 2006 May;273(9):1975–  
1073 88.
- 1074 100. Bonhoure N, Byrnes A, Moir RD, Hodroj W, Preitner F, Praz V, et al. Loss of the RNA polymerase III  
1075 repressor MAF1 confers obesity resistance. Genes Dev. 2015 May 1;29(9):934–47.
- 1076 101. van Dijken JP, van den Bosch E, Hermans JJ, de Miranda LR, Scheffers WA. Alcoholic fermentation by  
1077 ‘non-fermentative’ yeasts. Yeast. 1986 Jun;2(2):123–7.
- 1078 102. Godon C, Lagniel G, Lee J, Buhler JM, Kieffer S, Perrot M, et al. The H<sub>2</sub>O<sub>2</sub> stimulon in *Saccharomyces*  
1079 *cerevisiae*. J Biol Chem. 1998 Aug 28;273(35):22480–9.
- 1080 103. Ralser M, Wamelink MM, Kowald A, Gerisch B, Heeren G, Struys EA, et al. Dynamic rerouting of the  
1081 carbohydrate flux is key to counteracting oxidative stress. J Biol. 2007 Dec 21;6(4):10.
- 1082 104. Patra KC, Hay N. The pentose phosphate pathway and cancer. Trends Biochem Sci. 2014  
1083 Aug;39(8):347–54.
- 1084 105. Delaunay A, Pflieger D, Barrault MB, Vinh J, Toledano MB. A thiol peroxidase is an H<sub>2</sub>O<sub>2</sub> receptor and  
1085 redox-transducer in gene activation. Cell. 2002 Nov 15;111(4):471–81.
- 1086 106. Shenton D, Grant CM. Protein S-thiolation targets glycolysis and protein synthesis in response to  
1087 oxidative stress in the yeast *Saccharomyces cerevisiae*. Biochem J. 2003 Sep 1;374(Pt 2):513–9.
- 1088 107. Amelio I, Cutruzzolá F, Antonov A, Agostini M, Melino G. Serine and glycine metabolism in cancer.  
1089 Trends Biochem Sci. 2014 Apr;39(4):191–8.
- 1090 108. Heiden MG, Cantley LC, Thompson CB. Understanding the Warburg Effect: The Metabolic  
1091 Requirements of Cell Proliferation. Science. 2009 May 22;324(5930):1029–33.
- 1092 109. Kuehne A, Emmert H, Soehle J, Winnefeld M, Fischer F, Wenck H, et al. Acute Activation of Oxidative  
1093 Pentose Phosphate Pathway as First-Line Response to Oxidative Stress in Human Skin Cells. Molecular Cell.  
1094 2015 Aug 6;59(3):359–71.
- 1095 110. Echols N, Harrison P, Balasubramanian S, Luscombe NM, Bertone P, Zhang Z, et al. Comprehensive  
1096 analysis of amino acid and nucleotide composition in eukaryotic genomes, comparing genes and pseudogenes.  
1097 Nucleic Acids Res. 2002 Jun 1;30(11):2515–23.

- 1098 111. Avruch J, Long X, Ortiz-Vega S, Rapley J, Papageorgiou A, Dai N. Amino acid regulation of TOR complex  
1099 1. *Am J Physiol Endocrinol Metab.* 2009 Apr;296(4):E592-602.
- 1100 112. Sancak Y, Peterson TR, Shaul YD, Lindquist RA, Thoreen CC, Bar-Peled L, et al. The Rag GTPases bind  
1101 raptor and mediate amino acid signaling to mTORC1. *Science.* 2008 Jun 13;320(5882):1496–501.
- 1102 113. Saxton RA, Chantranupong L, Knockenhauer KE, Schwartz TU, Sabatini DM. Mechanism of arginine  
1103 sensing by CASTOR1 upstream of mTORC1. *Nature.* 2016 11;536(7615):229–33.
- 1104 114. Hopper AK. Transfer RNA Post-Transcriptional Processing, Turnover, and Subcellular Dynamics in the  
1105 Yeast *Saccharomyces cerevisiae*. *Genetics.* 2013 May;194(1):43–67.
- 1106 115. Becker-Kettern J, Paczia N, Conrotte J-F, Kay DP, Guignard C, Jung PP, et al. *Saccharomyces cerevisiae*  
1107 Forms D-2-Hydroxyglutarate and Couples Its Degradation to D-Lactate Formation via a Cytosolic  
1108 Transhydrogenase. *J Biol Chem.* 2016 Mar 18;291(12):6036–58.
- 1109 116. Losman J-A, Kaelin WG. What a difference a hydroxyl makes: mutant IDH, (R)-2-hydroxyglutarate, and  
1110 cancer. *Genes Dev.* 2013 Apr 15;27(8):836–52.
- 1111 117. Rideout EJ, Marshall L, Grewal SS. *Drosophila* RNA polymerase III repressor Maf1 controls body size  
1112 and developmental timing by modulating tRNA<sup>Met</sup> synthesis and systemic insulin signaling. *Proc Natl Acad Sci*  
1113 *USA.* 2012 Jan 24;109(4):1139–44.
- 1114 118. Pavon-Eternod M, Gomes S, Rosner MR, Pan T. Overexpression of initiator methionine tRNA leads to  
1115 global reprogramming of tRNA expression and increased proliferation in human epithelial cells. *RNA.* 2013  
1116 Apr;19(4):461–6.
- 1117 119. Dai Z, Mentch SJ, Gao X, Nichenametla SN, Locasale JW. Methionine metabolism influences genomic  
1118 architecture and gene expression through H3K4me3 peak width. *Nat Commun.* 2018 May 16;9.
- 1119 120. Campbell K, Vowinckel J, Keller MA, Ralser M. Methionine Metabolism Alters Oxidative Stress  
1120 Resistance via the Pentose Phosphate Pathway. *Antioxid Redox Signal.* 2016 Apr 1;24(10):543–7.
- 1121 121. Knaus R, Pollock R, Guarente L. Yeast SUB1 is a suppressor of TFIIIB mutations and has homology to the  
1122 human co-activator PC4. *EMBO J.* 1996 Apr 15;15(8):1933–40.
- 1123 122. Calvo O, Manley JL. The transcriptional coactivator PC4/Sub1 has multiple functions in RNA  
1124 polymerase II transcription. *EMBO J.* 2005 Mar 9;24(5):1009–20.
- 1125 123. Rosonina E, Willis IM, Manley JL. Sub1 functions in osmoregulation and in transcription by both RNA  
1126 polymerases II and III. *Mol Cell Biol.* 2009 Apr;29(8):2308–21.

- 1127 124. Henríquez R, Blobel G, Aris JP. Isolation and sequencing of NOP1. A yeast gene encoding a nucleolar  
1128 protein homologous to a human autoimmune antigen. *J Biol Chem.* 1990 Feb 5;265(4):2209–15.
- 1129 125. Schimmang T, Tollervey D, Kern H, Frank R, Hurt EC. A yeast nucleolar protein related to mammalian  
1130 fibrillarlin is associated with small nucleolar RNA and is essential for viability. *EMBO J.* 1989 Dec 20;8(13):4015–  
1131 24.
- 1132 126. Tessarz P, Santos-Rosa H, Robson SC, Sylvestersen KB, Nelson CJ, Nielsen ML, et al. Glutamine  
1133 methylation in histone H2A is an RNA-polymerase-I-dedicated modification. *Nature.* 2014 Jan  
1134 23;505(7484):564–8.
- 1135 127. Pinto I, Ware DE, Hampsey M. The yeast SUA7 gene encodes a homolog of human transcription factor  
1136 TFIIIB and is required for normal start site selection in vivo. *Cell.* 1992 Mar 6;68(5):977–88.
- 1137 128. Wu WH, Pinto I, Chen BS, Hampsey M. Mutational analysis of yeast TFIIIB. A functional relationship  
1138 between Ssu72 and Sub1/Tsp1 defined by allele-specific interactions with TFIIIB. *Genetics.* 1999  
1139 Oct;153(2):643–52.
- 1140 129. Cho EJ, Buratowski S. Evidence that transcription factor IIB is required for a post-assembly step in  
1141 transcription initiation. *J Biol Chem.* 1999 Sep 3;274(36):25807–13.
- 1142 130. Kim D-H, Sarbassov DD, Ali SM, King JE, Latek RR, Erdjument-Bromage H, et al. mTOR interacts with  
1143 raptor to form a nutrient-sensitive complex that signals to the cell growth machinery. *Cell.* 2002 Jul  
1144 26;110(2):163–75.
- 1145 131. Inoki K, Ouyang H, Li Y, Guan K-L. Signaling by target of rapamycin proteins in cell growth control.  
1146 *Microbiol Mol Biol Rev.* 2005 Mar;69(1):79–100.
- 1147 132. Martin DE, Hall MN. The expanding TOR signaling network. *Curr Opin Cell Biol.* 2005 Apr;17(2):158–66.
- 1148 133. Turowski TW, Karkusiewicz I, Kowal J, Boguta M. Maf1-mediated repression of RNA polymerase III  
1149 transcription inhibits tRNA degradation via RTD pathway. *RNA.* 2012 Oct;18(10):1823–32.
- 1150 134. Ellis SR, Morales MJ, Li JM, Hopper AK, Martin NC. Isolation and characterization of the TRM1 locus, a  
1151 gene essential for the N2,N2-dimethylguanosine modification of both mitochondrial and cytoplasmic tRNA in  
1152 *Saccharomyces cerevisiae*. *J Biol Chem.* 1986 Jul 25;261(21):9703–9.
- 1153 135. Powell CA, Nicholls TJ, Minczuk M. Nuclear-encoded factors involved in post-transcriptional processing  
1154 and modification of mitochondrial tRNAs in human disease. *Front Genet.* 2015;6:79.

- 1155 136. Massenet S, Motorin Y, Lafontaine DL, Hurt EC, Grosjean H, Branlant C. Pseudouridine mapping in the  
1156 *Saccharomyces cerevisiae* spliceosomal U small nuclear RNAs (snRNAs) reveals that pseudouridine synthase  
1157 *pus1p* exhibits a dual substrate specificity for U2 snRNA and tRNA. *Mol Cell Biol.* 1999 Mar;19(3):2142–54.
- 1158 137. Carlile TM, Rojas-Duran MF, Zinshteyn B, Shin H, Bartoli KM, Gilbert WV. Pseudouridine profiling  
1159 reveals regulated mRNA pseudouridylation in yeast and human cells. *Nature.* 2014 Nov 6;515(7525):143–6.
- 1160 138. Lalo D, Carles C, Sentenac A, Thuriaux P. Interactions between three common subunits of yeast RNA  
1161 polymerases I and III. *Proc Natl Acad Sci USA.* 1993 Jun 15;90(12):5524–8.
- 1162 139. Huang Y, Maraia RJ. Comparison of the RNA polymerase III transcription machinery in  
1163 *Schizosaccharomyces pombe*, *Saccharomyces cerevisiae* and human. *Nucleic Acids Res.* 2001 Jul  
1164 1;29(13):2675–90.
- 1165 140. Cramer P, Bushnell DA, Fu J, Gnatt AL, Maier-Davis B, Thompson NE, et al. Architecture of RNA  
1166 polymerase II and implications for the transcription mechanism. *Science.* 2000 Apr 28;288(5466):640–9.
- 1167 141. Chapon C, Cech TR, Zaugg AJ. Polyadenylation of telomerase RNA in budding yeast. *RNA.* 1997  
1168 Nov;3(11):1337–51.
- 1169
- 1170

## 1171 **Supporting information**

### 1172 **S1 Fig. Zwf1 (A) and the Ctt1 catalase activity (B) is increased in Maf1 deficient mutant.**

1173 Yeast cells logarithmically growing in YPD 2% glucose medium were harvested at  $A_{600} \approx 1.0$ . For Zwf1 activity  
1174 assay, NADH breakdown was measured at 340 nm in time at 30°C. For catalase activity, hydrogen peroxide  
1175 decomposition in reaction mixtures containing yeast cell free extracts was monitored as change in absorbance  
1176 at 240 nm in time at 30°C. Results are presented as total mean enzymatic activity from five independent  
1177 biological replicates with standard deviation expressed as  $\mu\text{mol}\cdot\text{min}^{-1}\cdot\text{mg}^{-1}$  protein. Asterix (\*) indicate  $p$ -value <  
1178 0.05 according to t-student test.

1179

### 1180 **S2 Fig. Real-time quantitative PCR analyses of LEU3 gene transcript.**

1181 Slight increase in *LEU3* transcript levels was observed in *rpc128-1007* in glucose medium. Opposite effect was  
1182 observed on glycerol-based rich medium. Maf1 deficiency cause 2-fold decrease in *LEU3* mRNA levels, when  
1183 grown non-fermentative carbon source and reduced in glucose-based rich medium. Yeast cells were grown in  
1184 2% glucose (YPD) or 2% glycerol (YPGly) rich medium at 30°C until an  $A_{600} \approx 1.0$ . SYBER-Green based Real-Time  
1185 PCR was performed. The expression level of each target PCR product was normalized to reference genes  
1186 transcript levels: *U2* spliceosomal RNA (*U2*) and small cytosolic RNA (*SCR1*). The means + standard deviations of  
1187 the relative expression levels from three independent biological replicates are shown. The value of basal gene  
1188 expression level of WT strain was assumed as 1.0. Asterisks (\*) indicate  $p$ -values  $\leq 0.05$  determined by t-  
1189 student test.

1190

### 1191 **S1 Table. Mean value for triplicate experiments of fermentative capacity assay of WT and *maf1Δ* cells.**

1192 Results are expressed in mM / g dry weight. 'C-limited' stands for 'carbon-limited conditions'.

1193

1194 **S2 Table. The list of 8 proteins involved in oxidative stress with higher abundance in *maf1Δ* and lowered**  
1195 **quantity in *rpc128-1007* mutant in comparison to wild-type reference strain under high glucose conditions**  
1196 **according to global proteomics.**

1197

1198

1199 **S3 Table. The list of 18 proteins regulated by RPN4 that are part of 26S proteasome and its core complex, 20S**  
1200 **proteasome, with lowered abundance in *rpc128-1007* mutant in comparison to wild-type reference strain**  
1201 **under high glucose conditions according to global proteomics.**

1202

1203 **S4 Table. The list of 73 proteins involved in ribosome biogenesis with lowered abundance in *rpc128-1007***  
1204 **mutant in comparison to wild-type reference strain under high glucose conditions according to global**  
1205 **proteomics.**

1206



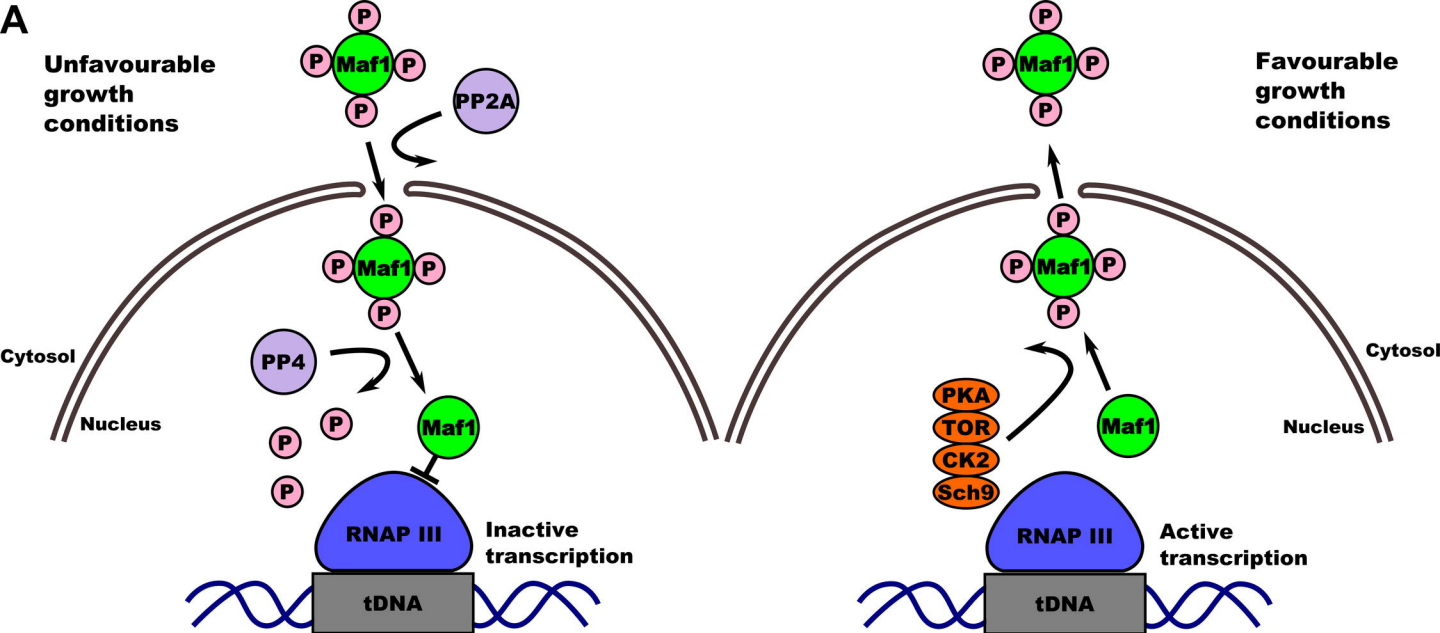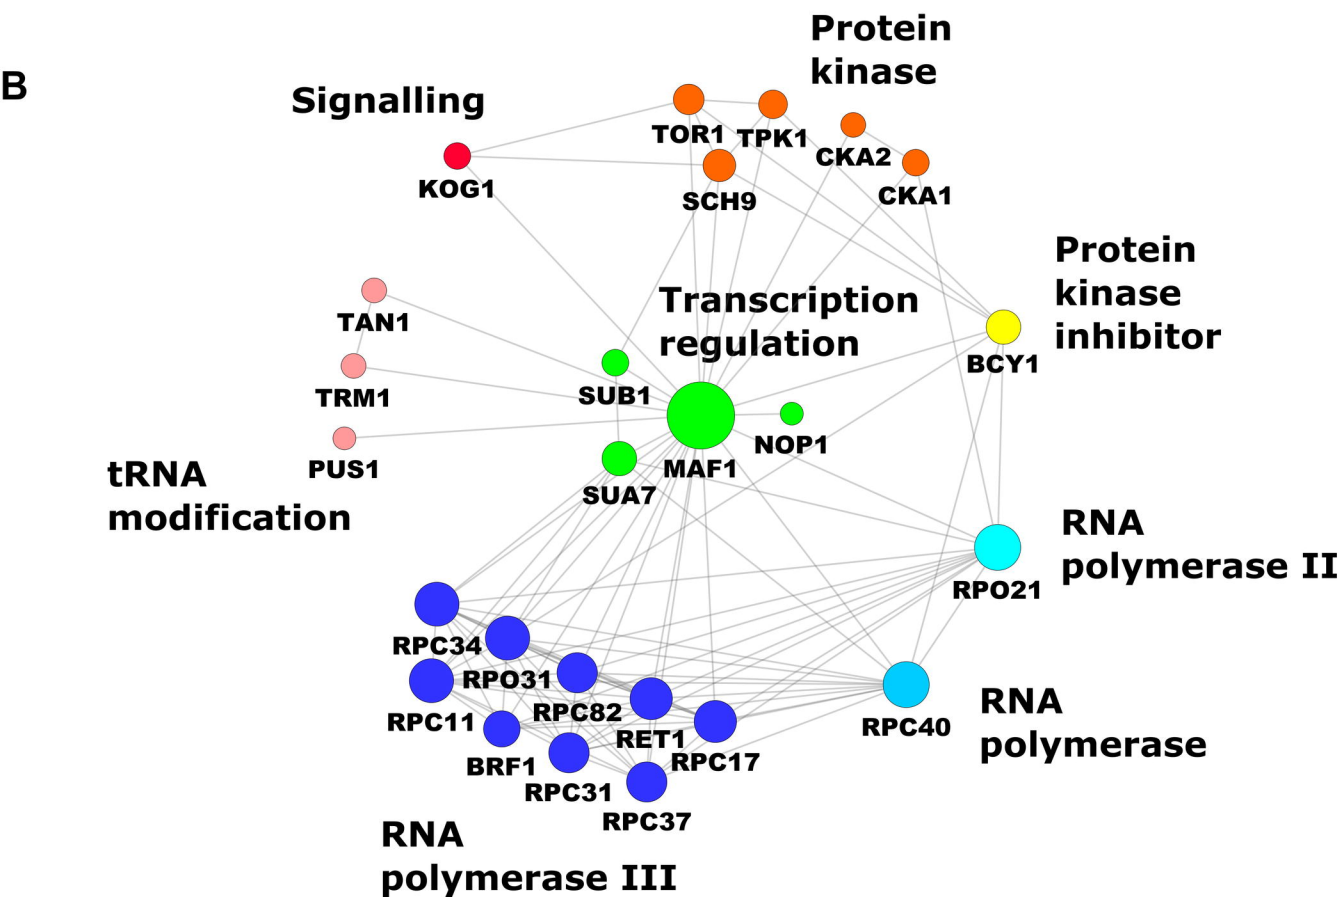

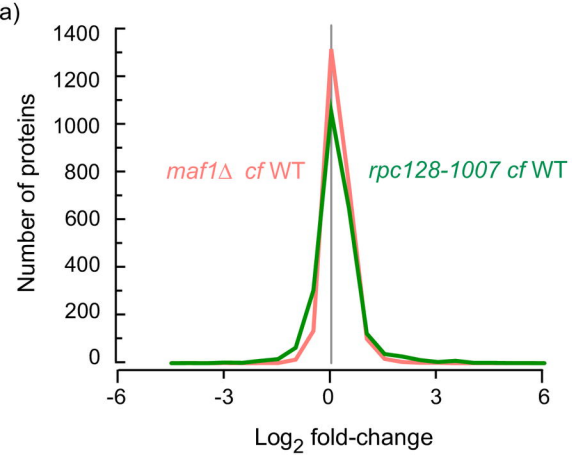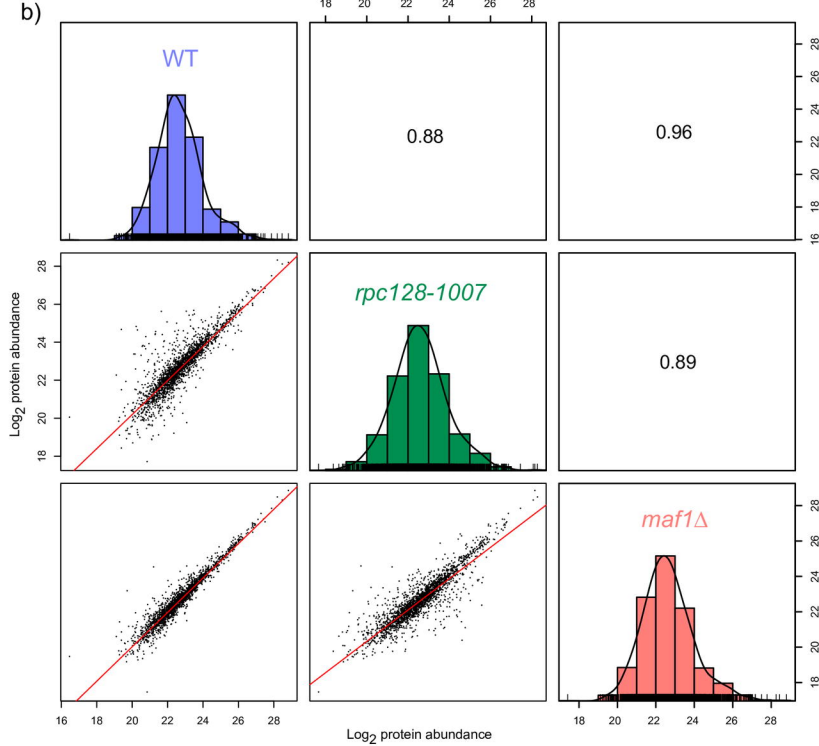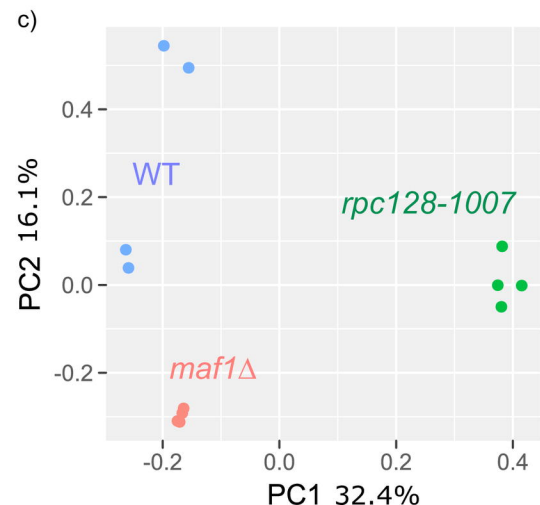

## All proteins

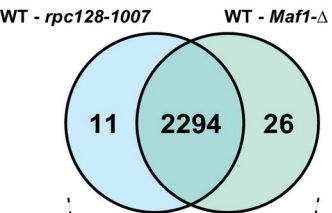

## Proteins with adj p value < 0.05

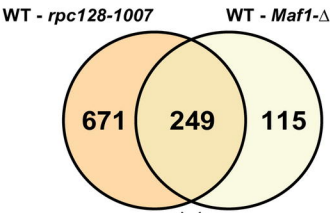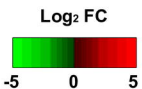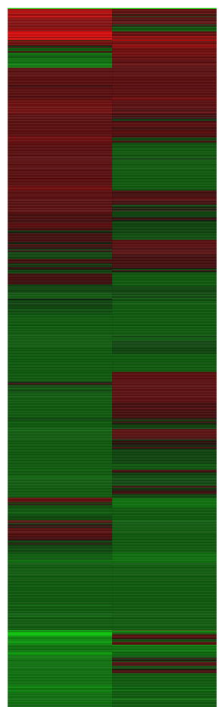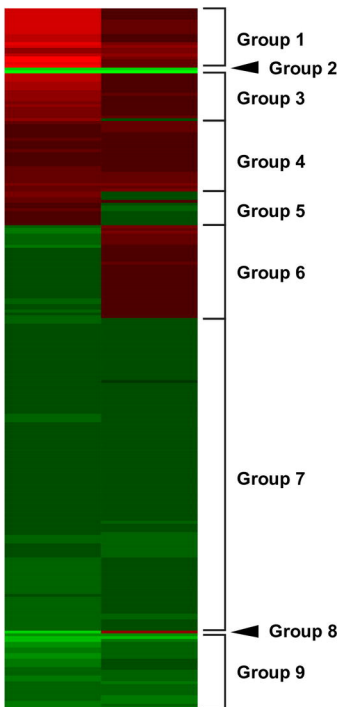

## Enriched GO biological process

|         |                                                                                                                                                                                                                                                                                                                                      |
|---------|--------------------------------------------------------------------------------------------------------------------------------------------------------------------------------------------------------------------------------------------------------------------------------------------------------------------------------------|
| Group 1 | Arginine biosynthetic process<br>Ornithine biosynthetic process<br>Urea cycle<br>Leucine biosynthetic process<br>Aspartate family amino acid biosynthetic process                                                                                                                                                                    |
| Group 2 | Glyoxylate cycle<br>Gluconeogenesis                                                                                                                                                                                                                                                                                                  |
| Group 3 | Aromatic amino acid family biosynthetic process<br>Lysine biosynthetic process<br>Tryptophan metabolic process<br>Methionine biosynthetic process<br>Dicarboxylic acid metabolic process                                                                                                                                             |
| Group 4 | Homocysteine metabolic process<br>Carboxylic acid biosynthetic process                                                                                                                                                                                                                                                               |
| Group 5 | Glycine catabolic process<br>Cellular amino acid metabolic process                                                                                                                                                                                                                                                                   |
| Group 6 | Trehalose metabolism in response to stress<br>Trehalose biosynthetic process<br>Replicative cell aging<br>Cellular response to oxidative stress<br>Single-organism carbohydrate catabolic process<br>Response to oxygen-containing compound<br>Oxidation-reduction process                                                           |
| Group 7 | Chaperone-mediated protein folding<br>'De novo' protein folding<br>Purine ribonucleoside monophosphate biosynthetic process<br>Purine ribonucleotide biosynthetic process<br>Mitochondrial transmembrane transport<br>Cytoplasmic translation<br>Single-organism intracellular transport<br>Cellular macromolecular complex assembly |
| Group 8 | Alcohol dehydrogenase                                                                                                                                                                                                                                                                                                                |
| Group 9 | 'De novo' IMP biosynthetic process<br>Tricarboxylic acid cycle<br>Carbohydrate metabolic process                                                                                                                                                                                                                                     |



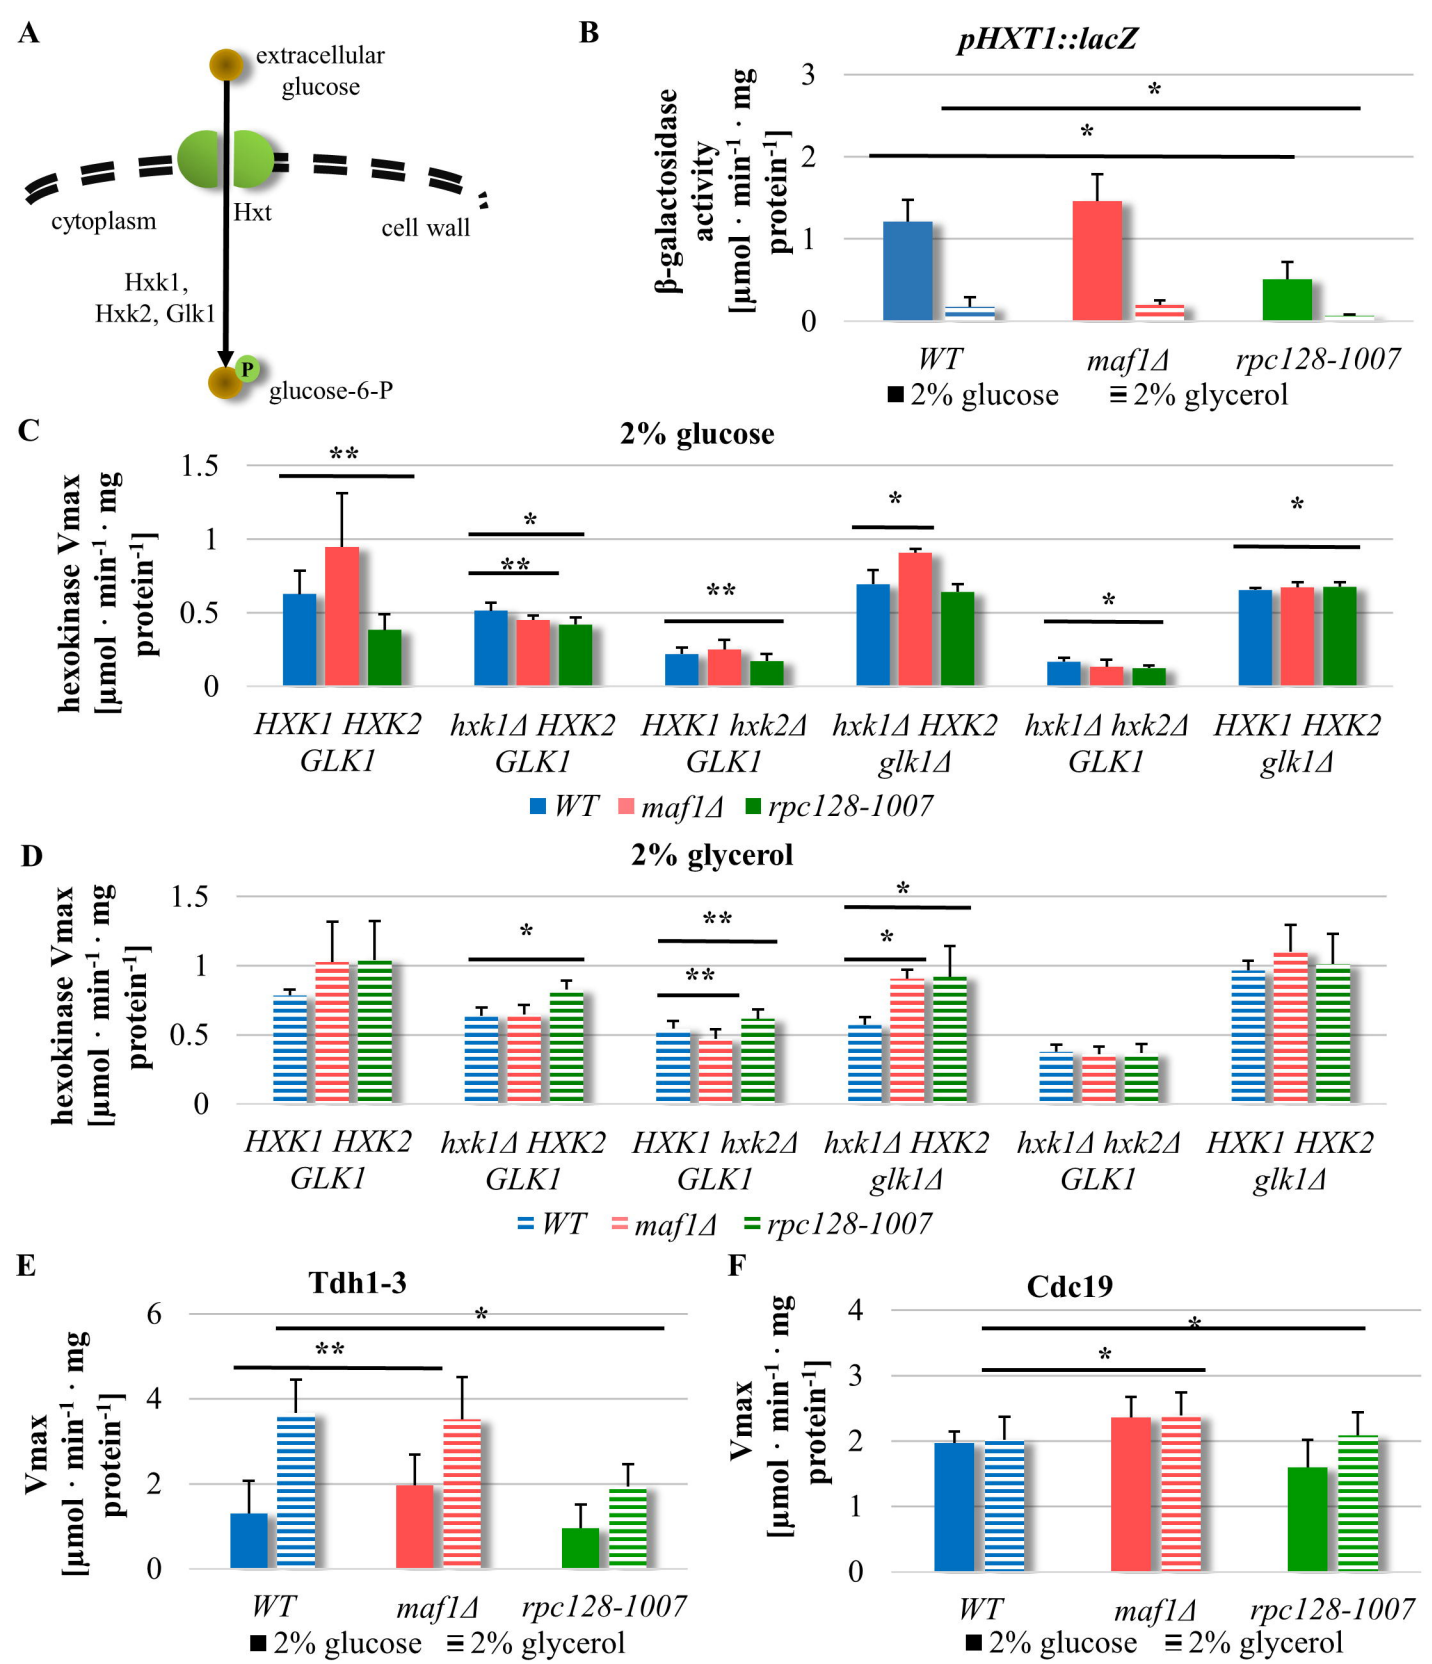

# Fructose 1,6 biphosphate

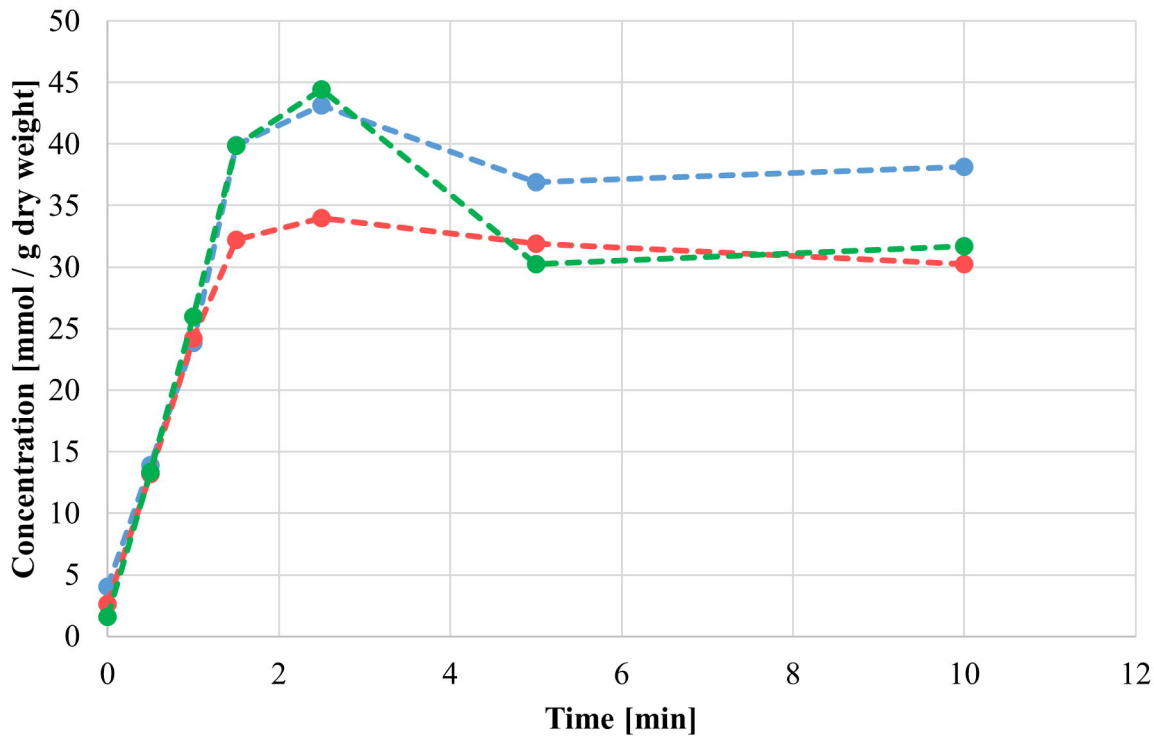

—●— *WT*    —●— *maf1Δ*    —●— *rpc128-1007*

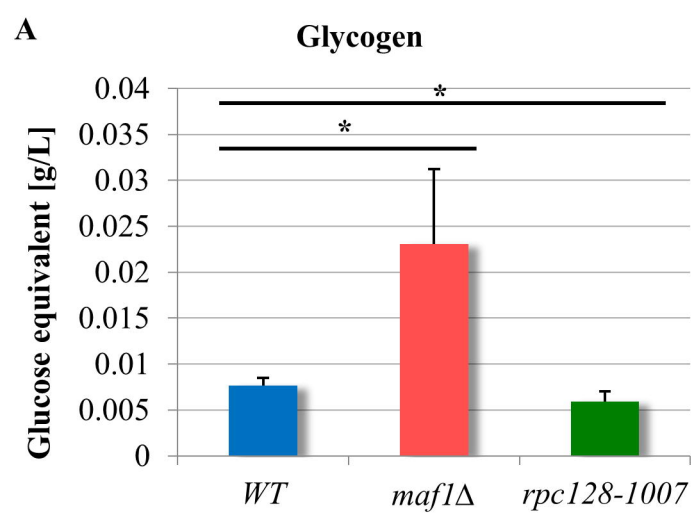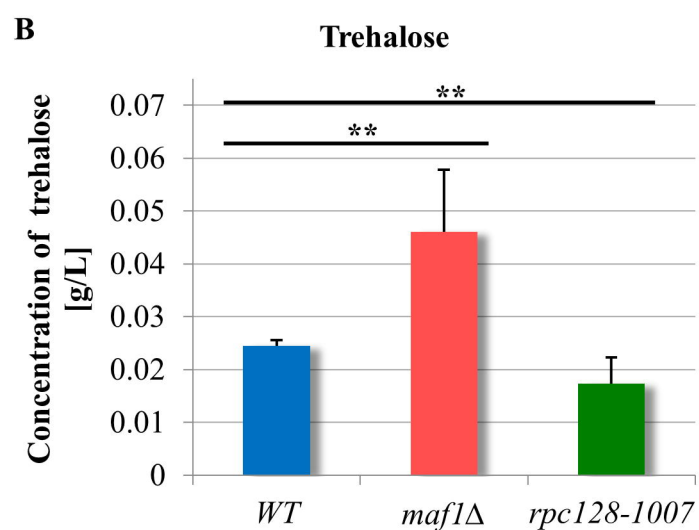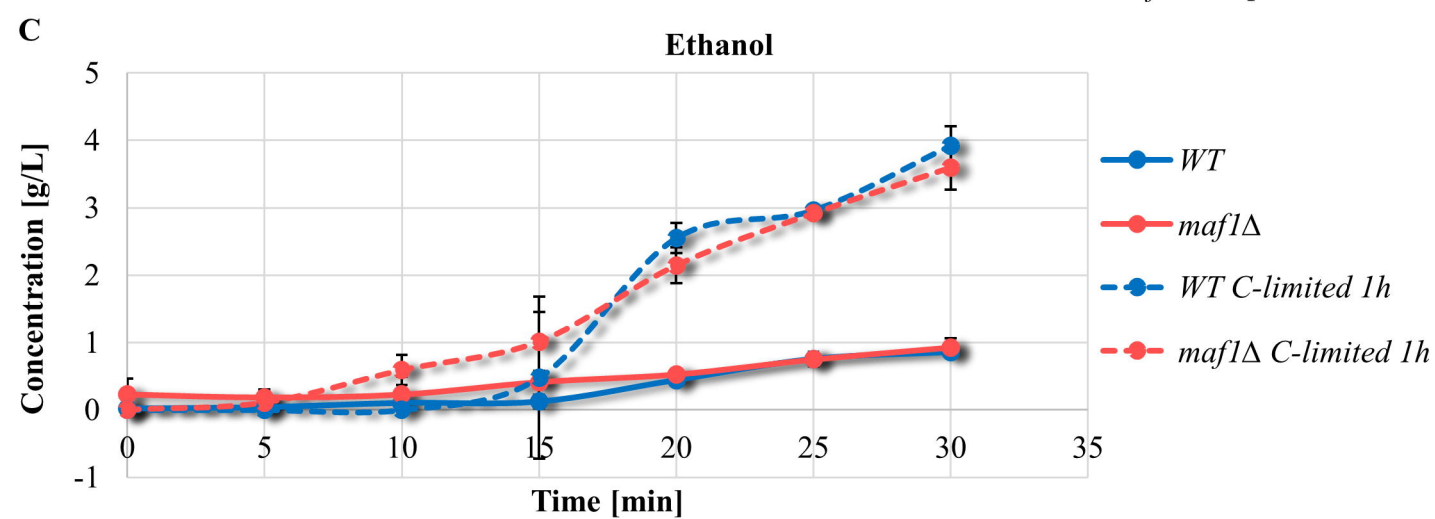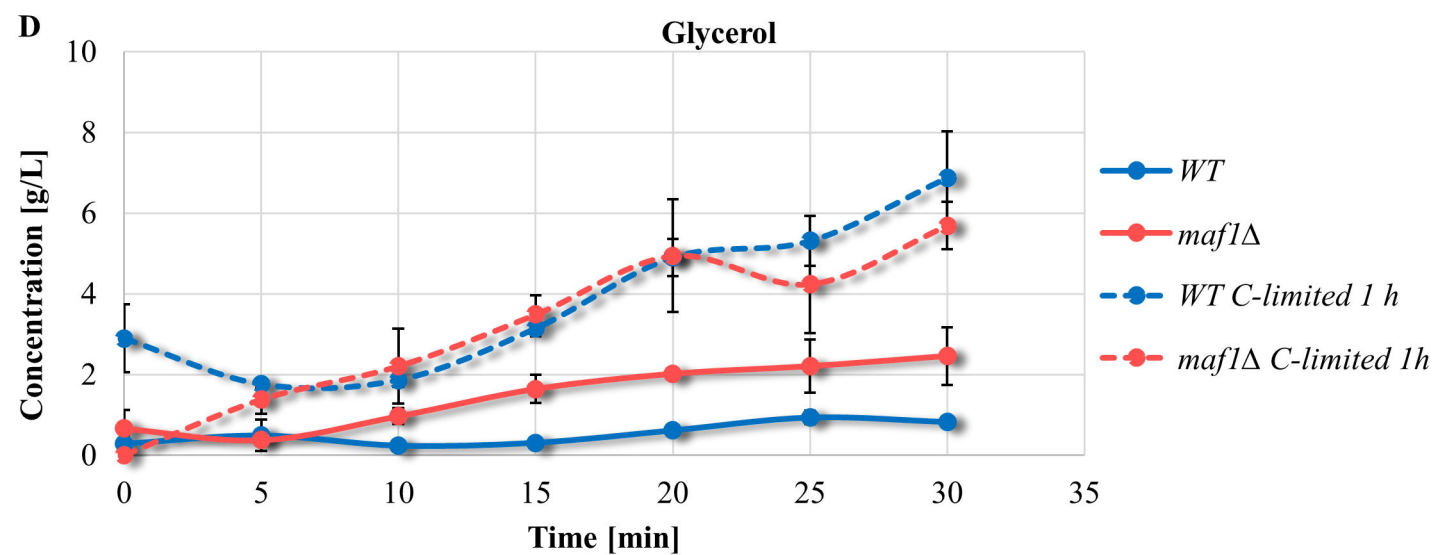

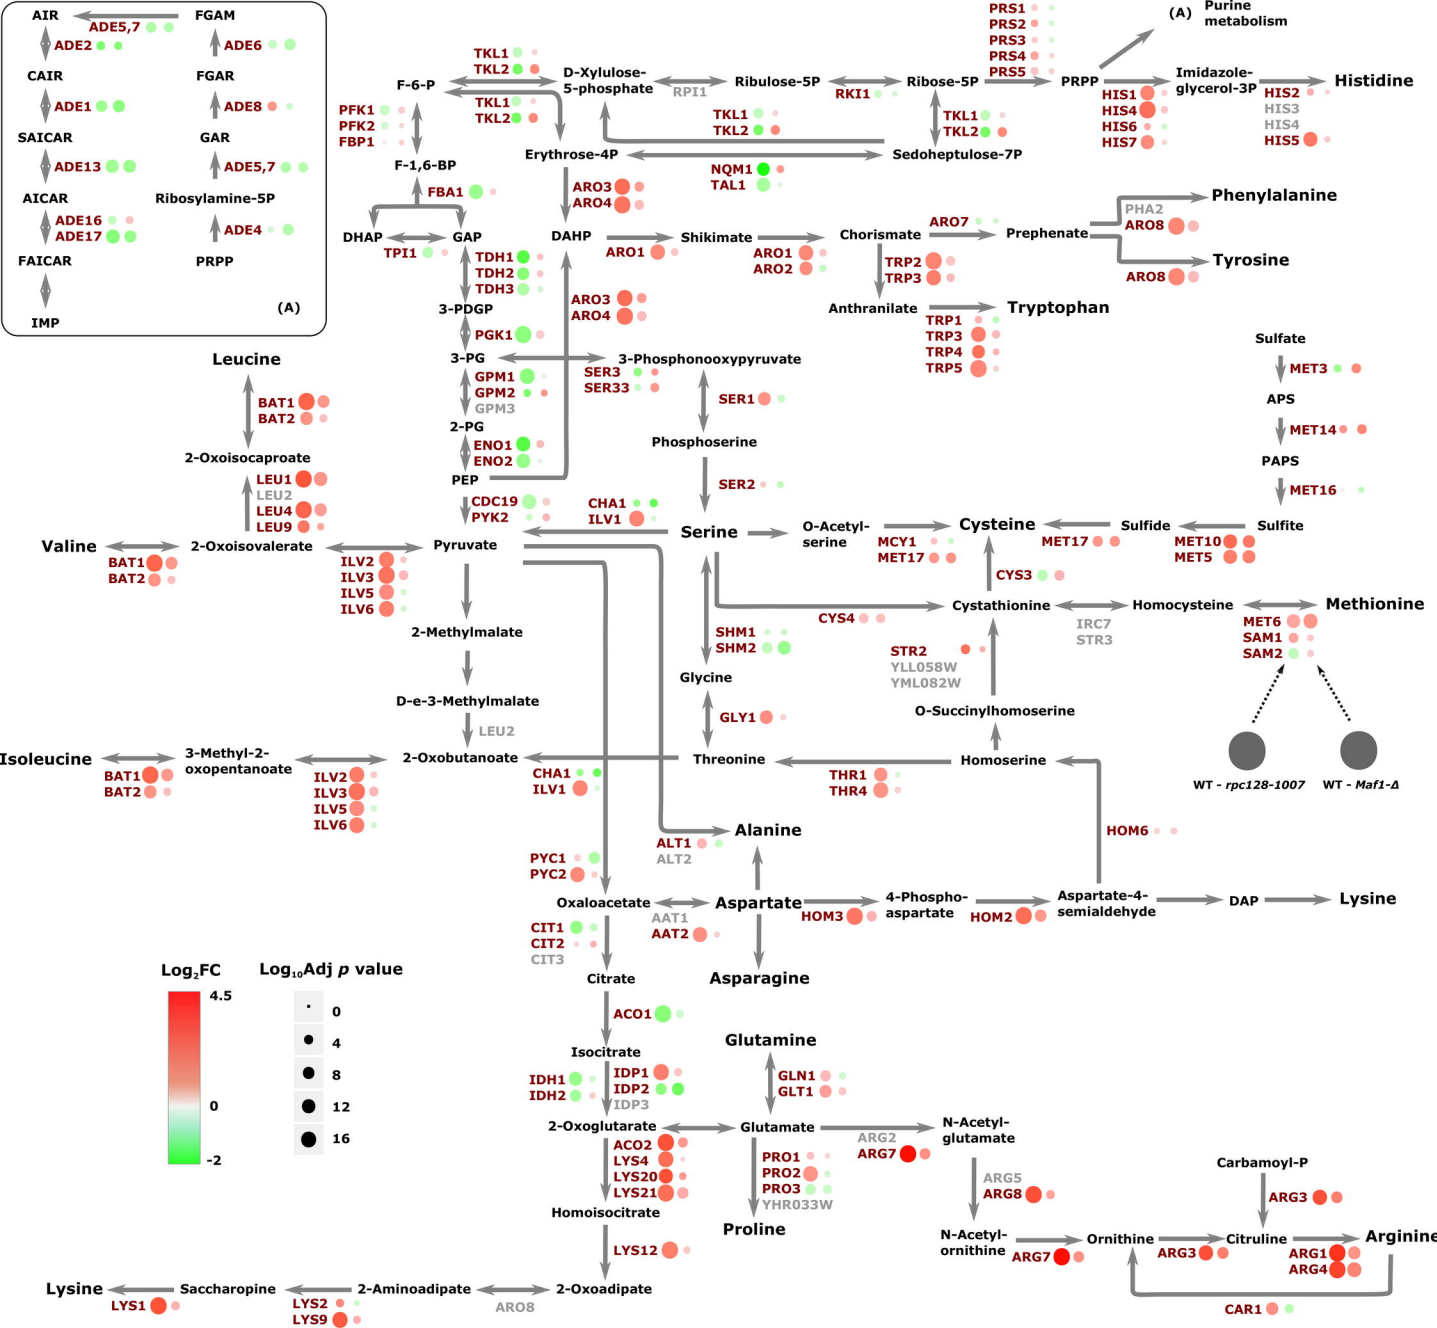



**A*****GCN4***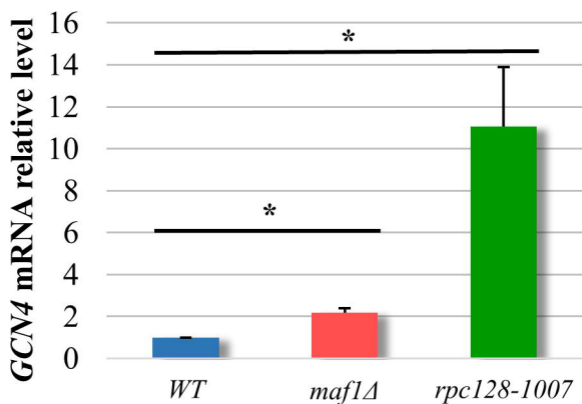**B****Gcn4-3HA**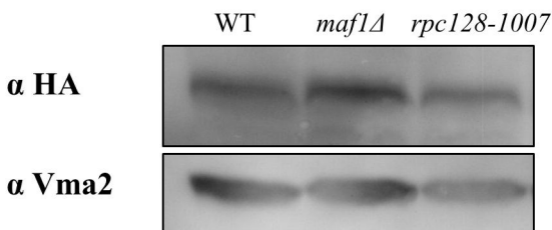**C**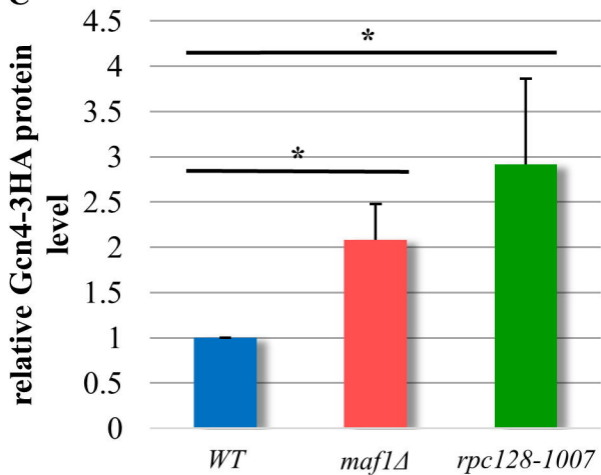

**Maf1 TF**

**rpc128 TF**

● Up regulated genes  
● Down regulated genes

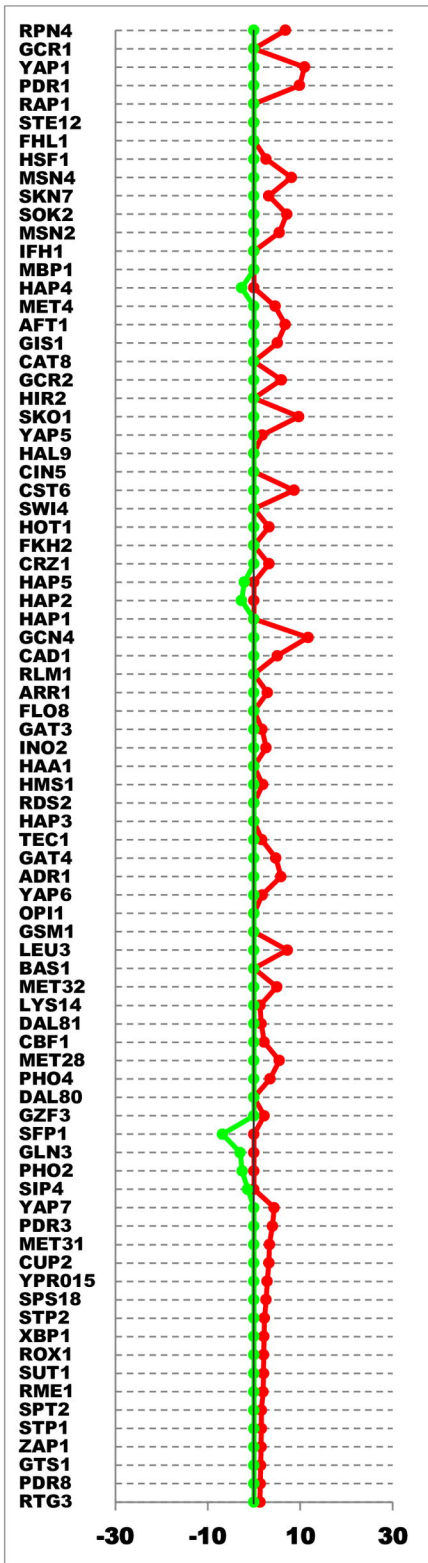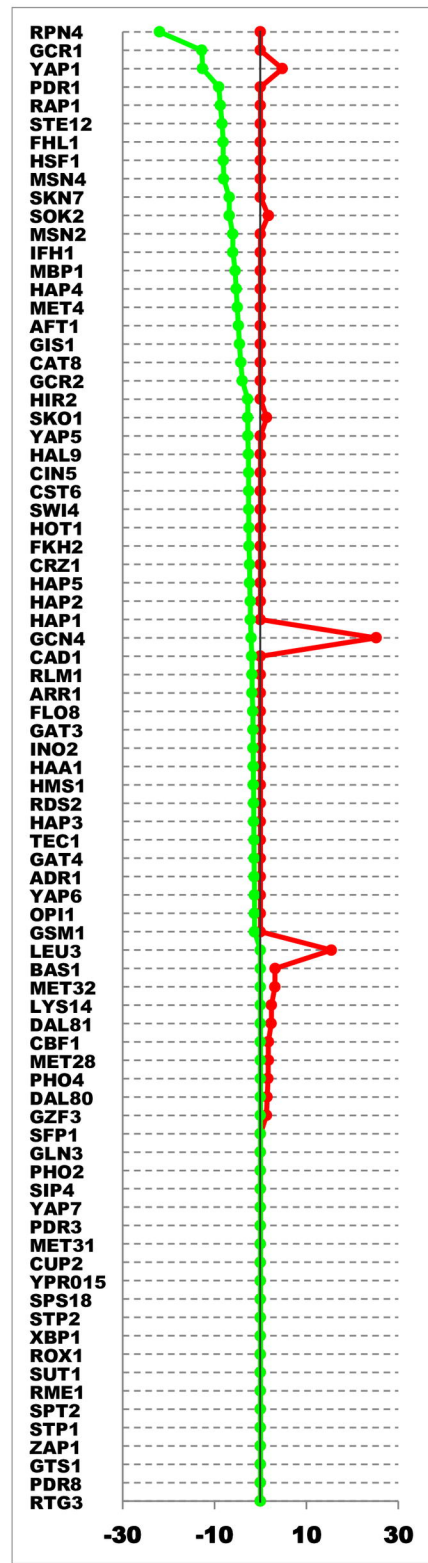

Log<sub>10</sub> Adj pvalue

*rpc128-1007*

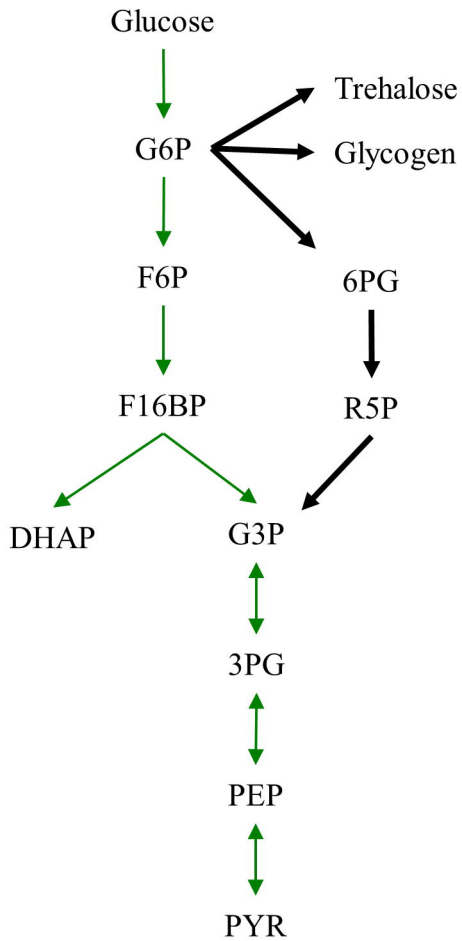

*wild-type*

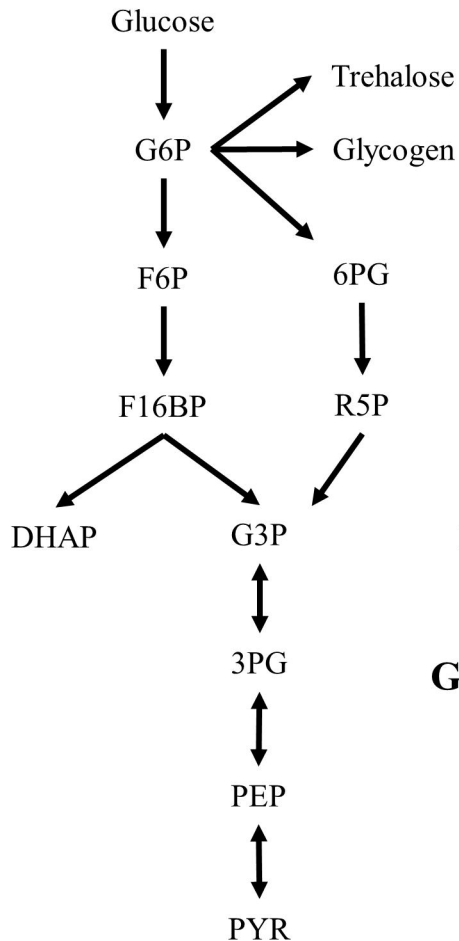

*maf1Δ*

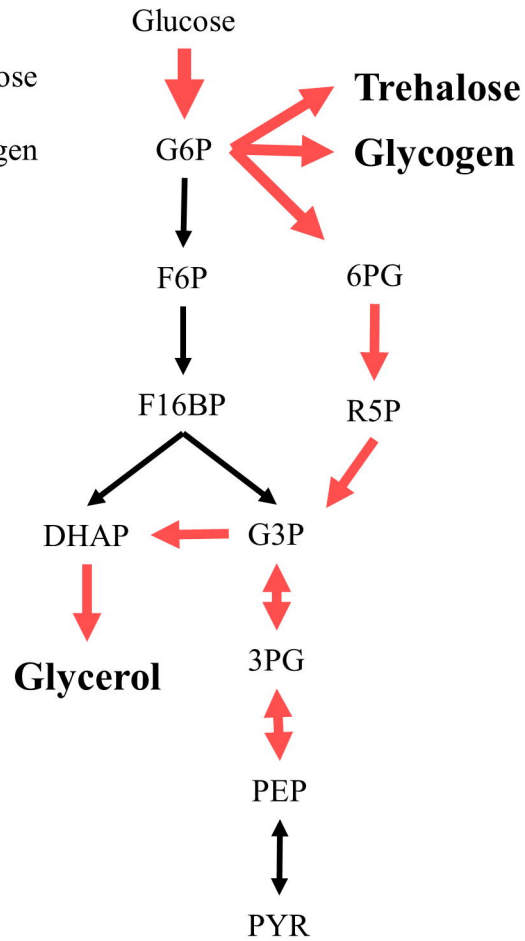

Source: http://biorxiv.org/content/10.1101/372946v1.full.pdf
